# Supplementary material
Source: HighWire-hosted journal article supplement (https://erj.ersjournals.com/content/59/5/2004503)
Supplement: inline-supplementary-material-2 [file inline-supplementary-material-2.xlsx]

## Sheet: full list_categories
Index	Feature Number	full name	Standardization Name	General Type	SubType	FeatureType
1	V1	Mean	mean	Intensity	Intensity	Unfiltered
2	V2	SD	standard deviation	Intensity	Intensity	Unfiltered
3	V3	COV	coefficient of variation	Intensity	Intensity	Unfiltered
4	V4	skewness	skewness	Intensity	Intensity	Unfiltered
5	V5	kurtosis	kurtosis	Intensity	Intensity	Unfiltered
6	V6	var	variance	Intensity	Intensity	Unfiltered
7	V7	median	median	Intensity	Intensity	Unfiltered
8	V8	percentile10	percentile 10th	Intensity	Intensity	Unfiltered
9	V9	percentile90	percentile 90th	Intensity	Intensity	Unfiltered
10	V10	iqr	interquartile range	Intensity	Intensity	Unfiltered
11	V11	Hrange	range	Intensity	Intensity	Unfiltered
12	V12	mad	mean absolut deviation	Intensity	Intensity	Unfiltered
13	V13	rmad	robust mean absolut deviation	Intensity	Intensity	Unfiltered
14	V14	H_energy	energy	Intensity	Intensity	Unfiltered
15	V15	H_entropy	entropy	Intensity	Intensity	Unfiltered
16	V16	rms	root mean square	Intensity	Intensity	Unfiltered
17	V17	H_uniformity	uniformity	Intensity	Intensity	Unfiltered
18	V18	energy	energy	Texture	GLCM	Unfiltered
19	V19	entropy	entropy	Texture	GLCM	Unfiltered
20	V20	contrast	contrast	Texture	GLCM	Unfiltered
21	V21	correlation	correlation	Texture	GLCM	Unfiltered
22	V22	homogenity	homogeneity	Texture	GLCM	Unfiltered
23	V23	homogenity_n	homogeneity normalized	Texture	GLCM	Unfiltered
24	V24	idiff	inverese difference	Texture	GLCM	Unfiltered
25	V25	idiff_n	inverese difference normalized	Texture	GLCM	Unfiltered
26	V26	variance	variance	Texture	GLCM	Unfiltered
27	V27	sum_average	sum of average	Texture	GLCM	Unfiltered
28	V28	sum_entropy	sum of entropy	Texture	GLCM	Unfiltered
29	V29	sum_variance	sum of variance	Texture	GLCM	Unfiltered
30	V30	diff_entropy	difference entropy	Texture	GLCM	Unfiltered
31	V31	diff_variance	difference variance	Texture	GLCM	Unfiltered
32	V32	IMC1	information measures of correlation 1	Texture	GLCM	Unfiltered
33	V33	IMC2	information measures of correlation 2	Texture	GLCM	Unfiltered
34	V34	MCC	maximal correlation coefficient	Texture	GLCM	Unfiltered
35	V35	joint_max	joint maximum	Texture	GLCM	Unfiltered
36	V36	joint_average	joint average	Texture	GLCM	Unfiltered
37	V37	diff_average	difference average	Texture	GLCM	Unfiltered
38	V38	dissimilarity	dissimilarity	Texture	GLCM	Unfiltered
39	V39	inverse_variance	inverse variance	Texture	GLCM	Unfiltered
40	V40	autocorrelation	autocorrelation	Texture	GLCM	Unfiltered
41	V41	clust_tendency	cluster tendency	Texture	GLCM	Unfiltered
42	V42	clust_shade	cluster shade	Texture	GLCM	Unfiltered
43	V43	clust_prominence	cluster prominence	Texture	GLCM	Unfiltered
44	V44	M_energy	energy	Texture	mGLCM	Unfiltered
45	V45	M_entropy	entropy	Texture	mGLCM	Unfiltered
46	V46	M_contrast	contrast	Texture	mGLCM	Unfiltered
47	V47	M_correlation	correlation	Texture	mGLCM	Unfiltered
48	V48	M_homogenity	homogeneity	Texture	mGLCM	Unfiltered
49	V49	M_homogenity_n	homogeneity normalized	Texture	mGLCM	Unfiltered
50	V50	M_idiff	inverese difference	Texture	mGLCM	Unfiltered
51	V51	M_idiff_n	inverese difference normalized	Texture	mGLCM	Unfiltered
52	V52	M_variance	variance	Texture	mGLCM	Unfiltered
53	V53	M_sum_average	sum of average	Texture	mGLCM	Unfiltered
54	V54	M_sum_entropy	sum of entropy	Texture	mGLCM	Unfiltered
55	V55	M_sum_variance	sum of variance	Texture	mGLCM	Unfiltered
56	V56	M_diff_entropy	difference entropy	Texture	mGLCM	Unfiltered
57	V57	M_diff_variance	difference variance	Texture	mGLCM	Unfiltered
58	V58	M_IMC1	information measures of correlation 1	Texture	mGLCM	Unfiltered
59	V59	M_IMC2	information measures of correlation 2	Texture	mGLCM	Unfiltered
60	V60	M_MCC	maximal correlation coefficient	Texture	mGLCM	Unfiltered
61	V61	M_joint_max	joint maximum	Texture	mGLCM	Unfiltered
62	V62	M_joint_average	joint average	Texture	mGLCM	Unfiltered
63	V63	M_diff_average	difference average	Texture	mGLCM	Unfiltered
64	V64	M_dissimilarity	dissimilarity	Texture	mGLCM	Unfiltered
65	V65	M_inverse_variance	inverse variance	Texture	mGLCM	Unfiltered
66	V66	M_autocorrelation	autocorrelation	Texture	mGLCM	Unfiltered
67	V67	M_clust_tendency	cluster tendency	Texture	mGLCM	Unfiltered
68	V68	M_clust_shade	cluster shade	Texture	mGLCM	Unfiltered
69	V69	M_clust_prominence	cluster prominence	Texture	mGLCM	Unfiltered
70	V70	coarseness	coarseness	Texture	NGTDM	Unfiltered
71	V71	neighContrast	contrast	Texture	NGTDM	Unfiltered
72	V72	busyness	busyness	Texture	NGTDM	Unfiltered
73	V73	complexity	complexity	Texture	NGTDM	Unfiltered
74	V74	strength	strength	Texture	NGTDM	Unfiltered
75	V75	len_intensityVar	grey level non-uniformity	Texture	GLRLM	Unfiltered
76	V76	len_intensityVar_n	grey level non-uniformity normalized	Texture	GLRLM	Unfiltered
77	V77	len_sizeVar	zone size non-uniformity	Texture	GLRLM	Unfiltered
78	V78	len_sizeVar_n	zone size non-uniformity normalized	Texture	GLRLM	Unfiltered
79	V79	len_sse	short runs emphasis	Texture	GLRLM	Unfiltered
80	V80	len_lse	long runs emphasis	Texture	GLRLM	Unfiltered
81	V81	len_lgse	low grey level run emphasis	Texture	GLRLM	Unfiltered
82	V82	len_hgse	high grey level run emphasis	Texture	GLRLM	Unfiltered
83	V83	len_sslge	short run low grey level emphasis	Texture	GLRLM	Unfiltered
84	V84	len_sshge	short run high grey level emphasis	Texture	GLRLM	Unfiltered
85	V85	len_lslge	long run low grey level emphasis	Texture	GLRLM	Unfiltered
86	V86	len_lshge	long run high grey level emphasis	Texture	GLRLM	Unfiltered
87	V87	len_rpc	run percentage	Texture	GLRLM	Unfiltered
88	V88	len_grey_lev_var	grey level variance	Texture	GLRLM	Unfiltered
89	V89	len_zone_size_var	run length variance	Texture	GLRLM	Unfiltered
90	V90	len_size_entropy	run entropy	Texture	GLRLM	Unfiltered
91	V91	M_len_intensityVar	grey level non-uniformity	Texture	mGLRLM	Unfiltered
92	V92	M_len_intensityVar_n	grey level non-uniformity normalized	Texture	mGLRLM	Unfiltered
93	V93	M_len_sizeVar	zone size non-uniformity	Texture	mGLRLM	Unfiltered
94	V94	M_len_sizeVar_n	zone size non-uniformity normalized	Texture	mGLRLM	Unfiltered
95	V95	M_len_sse	short runs emphasis	Texture	mGLRLM	Unfiltered
96	V96	M_len_lse	long runs emphasis	Texture	mGLRLM	Unfiltered
97	V97	M_len_lgse	low grey level run emphasis	Texture	mGLRLM	Unfiltered
98	V98	M_len_hgse	high grey level run emphasis	Texture	mGLRLM	Unfiltered
99	V99	M_len_sslge	short run low grey level emphasis	Texture	mGLRLM	Unfiltered
100	V100	M_len_sshge	short run high grey level emphasis	Texture	mGLRLM	Unfiltered
101	V101	M_len_lslge	long run low grey level emphasis	Texture	mGLRLM	Unfiltered
102	V102	M_len_lshge	long run high grey level emphasis	Texture	mGLRLM	Unfiltered
103	V103	M_len_rpc	run percentage	Texture	mGLRLM	Unfiltered
104	V104	M_len_grey_lev_var	grey level variance	Texture	mGLRLM	Unfiltered
105	V105	M_len_zone_size_var	run length variance	Texture	mGLRLM	Unfiltered
106	V106	M_len_size_entropy	run entropy	Texture	mGLRLM	Unfiltered
107	V107	intensityVar	grey level non-uniformity	Texture	GLSZM	Unfiltered
108	V108	intensityVar_n	grey level non-uniformity normalized	Texture	GLSZM	Unfiltered
109	V109	sizeVar	zone size non-uniformity	Texture	GLSZM	Unfiltered
110	V110	sizeVar_n	zone size non-uniformity normalized	Texture	GLSZM	Unfiltered
111	V111	sse	small zone emphasis	Texture	GLSZM	Unfiltered
112	V112	lse	large zone emphasis	Texture	GLSZM	Unfiltered
113	V113	lgse	low grey level zone emphasis	Texture	GLSZM	Unfiltered
114	V114	hgse	high grey level zone emphasis	Texture	GLSZM	Unfiltered
115	V115	sslge	small zone low grey level emphasis	Texture	GLSZM	Unfiltered
116	V116	sshge	small zone high grey level emphasis	Texture	GLSZM	Unfiltered
117	V117	lslge	large zone low grey level emphasis	Texture	GLSZM	Unfiltered
118	V118	lshge	large zone high grey level emphasis	Texture	GLSZM	Unfiltered
119	V119	rpc	zone percentage	Texture	GLSZM	Unfiltered
120	V120	grey_lev_var	grey level variance	Texture	GLSZM	Unfiltered
121	V121	zone_size_var	zone size variance	Texture	GLSZM	Unfiltered
122	V122	size_entropy	zone size entropy	Texture	GLSZM	Unfiltered
123	V123	GLDZM_intensityVar	grey level non-uniformity	Texture	GLDZM	Unfiltered
124	V124	GLDZM_intensityVar_n	grey level non-uniformity normalized	Texture	GLDZM	Unfiltered
125	V125	GLDZM_sizeVar	zone size non-uniformity	Texture	GLDZM	Unfiltered
126	V126	GLDZM_sizeVar_n	zone size non-uniformity normalized	Texture	GLDZM	Unfiltered
127	V127	GLDZM_sse	small distance emphasis	Texture	GLDZM	Unfiltered
128	V128	GLDZM_lse	large distance emphasis	Texture	GLDZM	Unfiltered
129	V129	GLDZM_lgse	low grey level zone emphasis	Texture	GLDZM	Unfiltered
130	V130	GLDZM_hgse	high grey level zone emphasis	Texture	GLDZM	Unfiltered
131	V131	GLDZM_sslge	small distance low grey level emphasis	Texture	GLDZM	Unfiltered
132	V132	GLDZM_sshge	small distance high grey level emphasis	Texture	GLDZM	Unfiltered
133	V133	GLDZM_lslge	large distance low grey level emphasis	Texture	GLDZM	Unfiltered
134	V134	GLDZM_lshge	large distance high grey level emphasis	Texture	GLDZM	Unfiltered
135	V135	GLDZM_rpc	zone percentage	Texture	GLDZM	Unfiltered
136	V136	GLDZM_grey_lev_var	grey level variance	Texture	GLDZM	Unfiltered
137	V137	GLDZM_zone_size_var	zone distance variance	Texture	GLDZM	Unfiltered
138	V138	GLDZM_size_entropy	zone distance entropy	Texture	GLDZM	Unfiltered
139	V139	NGLDM_intensityVar	grey level non-uniformity	Texture	NGLDM	Unfiltered
140	V140	NGLDM_intensityVar_n	grey level non-uniformity normalized	Texture	NGLDM	Unfiltered
141	V141	NGLDM_sizeVar	dependence count non-uniformity	Texture	NGLDM	Unfiltered
142	V142	NGLDM_sizeVar_n	dependence count non-uniformity normalized	Texture	NGLDM	Unfiltered
143	V143	NGLDM_sse	low dependence emphasis	Texture	NGLDM	Unfiltered
144	V144	NGLDM_lse	high dependence emphasis	Texture	NGLDM	Unfiltered
145	V145	NGLDM_lgse	low grey level count emphasis	Texture	NGLDM	Unfiltered
146	V146	NGLDM_hgse	high grey level count emphasis	Texture	NGLDM	Unfiltered
147	V147	NGLDM_sslge	low dependence low grey level emphasis	Texture	NGLDM	Unfiltered
148	V148	NGLDM_sshge	low dependence high grey level emphasis	Texture	NGLDM	Unfiltered
149	V149	NGLDM_lslge	high dependence low grey level emphasis	Texture	NGLDM	Unfiltered
150	V150	NGLDM_lshge	high dependence high grey level emphasis	Texture	NGLDM	Unfiltered
151	V151	NGLDM_grey_lev_var	grey level variance	Texture	NGLDM	Unfiltered
152	V152	NGLDM_zone_size_var	dependence count variance	Texture	NGLDM	Unfiltered
153	V153	NGLDM_size_entropy	dependence count entropy	Texture	NGLDM	Unfiltered
154	V154	NGLDM_energy	dependence count energy	Texture	NGLDM	Unfiltered
155	V155	Mean	mean	Wavelet	intensity	HHH
156	V156	SD	standard deviation	Wavelet	intensity	HHH
157	V157	COV	coefficient of variation	Wavelet	intensity	HHH
158	V158	skewness	skewness	Wavelet	intensity	HHH
159	V159	kurtosis	kurtosis	Wavelet	intensity	HHH
160	V160	var	variance	Wavelet	intensity	HHH
161	V161	median	median	Wavelet	intensity	HHH
162	V162	percentile10	percentile 10th	Wavelet	intensity	HHH
163	V163	percentile90	percentile 90th	Wavelet	intensity	HHH
164	V164	iqr	interquartile range	Wavelet	intensity	HHH
165	V165	Hrange	range	Wavelet	intensity	HHH
166	V166	mad	mean absolut deviation	Wavelet	intensity	HHH
167	V167	rmad	robust mean absolut deviation	Wavelet	intensity	HHH
168	V168	H_energy	energy	Wavelet	intensity	HHH
169	V169	H_entropy	entropy	Wavelet	intensity	HHH
170	V170	rms	root mean square	Wavelet	intensity	HHH
171	V171	H_uniformity	uniformity	Wavelet	intensity	HHH
172	V172	energy	energy	Wavelet	GLCM	HHH
173	V173	entropy	entropy	Wavelet	GLCM	HHH
174	V174	contrast	contrast	Wavelet	GLCM	HHH
175	V175	correlation	correlation	Wavelet	GLCM	HHH
176	V176	homogenity	homogeneity	Wavelet	GLCM	HHH
177	V177	homogenity_n	homogeneity normalized	Wavelet	GLCM	HHH
178	V178	idiff	inverese difference	Wavelet	GLCM	HHH
179	V179	idiff_n	inverese difference normalized	Wavelet	GLCM	HHH
180	V180	variance	variance	Wavelet	GLCM	HHH
181	V181	sum_average	sum of average	Wavelet	GLCM	HHH
182	V182	sum_entropy	sum of entropy	Wavelet	GLCM	HHH
183	V183	sum_variance	sum of variance	Wavelet	GLCM	HHH
184	V184	diff_entropy	difference entropy	Wavelet	GLCM	HHH
185	V185	diff_variance	difference variance	Wavelet	GLCM	HHH
186	V186	IMC1	information measures of correlation 1	Wavelet	GLCM	HHH
187	V187	IMC2	information measures of correlation 2	Wavelet	GLCM	HHH
188	V188	MCC	maximal correlation coefficient	Wavelet	GLCM	HHH
189	V189	joint_max	joint maximum	Wavelet	GLCM	HHH
190	V190	joint_average	joint average	Wavelet	GLCM	HHH
191	V191	diff_average	difference average	Wavelet	GLCM	HHH
192	V192	dissimilarity	dissimilarity	Wavelet	GLCM	HHH
193	V193	inverse_variance	inverse variance	Wavelet	GLCM	HHH
194	V194	autocorrelation	autocorrelation	Wavelet	GLCM	HHH
195	V195	clust_tendency	cluster tendency	Wavelet	GLCM	HHH
196	V196	clust_shade	cluster shade	Wavelet	GLCM	HHH
197	V197	clust_prominence	cluster prominence	Wavelet	GLCM	HHH
198	V198	M_energy	energy	Wavelet	mGLCM	HHH
199	V199	M_entropy	entropy	Wavelet	mGLCM	HHH
200	V200	M_contrast	contrast	Wavelet	mGLCM	HHH
201	V201	M_correlation	correlation	Wavelet	mGLCM	HHH
202	V202	M_homogenity	homogeneity	Wavelet	mGLCM	HHH
203	V203	M_homogenity_n	homogeneity normalized	Wavelet	mGLCM	HHH
204	V204	M_idiff	inverese difference	Wavelet	mGLCM	HHH
205	V205	M_idiff_n	inverese difference normalized	Wavelet	mGLCM	HHH
206	V206	M_variance	variance	Wavelet	mGLCM	HHH
207	V207	M_sum_average	sum of average	Wavelet	mGLCM	HHH
208	V208	M_sum_entropy	sum of entropy	Wavelet	mGLCM	HHH
209	V209	M_sum_variance	sum of variance	Wavelet	mGLCM	HHH
210	V210	M_diff_entropy	difference entropy	Wavelet	mGLCM	HHH
211	V211	M_diff_variance	difference variance	Wavelet	mGLCM	HHH
212	V212	M_IMC1	information measures of correlation 1	Wavelet	mGLCM	HHH
213	V213	M_IMC2	information measures of correlation 2	Wavelet	mGLCM	HHH
214	V214	M_MCC	maximal correlation coefficient	Wavelet	mGLCM	HHH
215	V215	M_joint_max	joint maximum	Wavelet	mGLCM	HHH
216	V216	M_joint_average	joint average	Wavelet	mGLCM	HHH
217	V217	M_diff_average	difference average	Wavelet	mGLCM	HHH
218	V218	M_dissimilarity	dissimilarity	Wavelet	mGLCM	HHH
219	V219	M_inverse_variance	inverse variance	Wavelet	mGLCM	HHH
220	V220	M_autocorrelation	autocorrelation	Wavelet	mGLCM	HHH
221	V221	M_clust_tendency	cluster tendency	Wavelet	mGLCM	HHH
222	V222	M_clust_shade	cluster shade	Wavelet	mGLCM	HHH
223	V223	M_clust_prominence	cluster prominence	Wavelet	mGLCM	HHH
224	V224	coarseness	coarseness	Wavelet	NGTDM	HHH
225	V225	neighContrast	contrast	Wavelet	NGTDM	HHH
226	V226	busyness	busyness	Wavelet	NGTDM	HHH
227	V227	complexity	complexity	Wavelet	NGTDM	HHH
228	V228	strength	strength	Wavelet	NGTDM	HHH
229	V229	len_intensityVar	grey level non-uniformity	Wavelet	GLRLM	HHH
230	V230	len_intensityVar_n	grey level non-uniformity normalized	Wavelet	GLRLM	HHH
231	V231	len_sizeVar	zone size non-uniformity	Wavelet	GLRLM	HHH
232	V232	len_sizeVar_n	zone size non-uniformity normalized	Wavelet	GLRLM	HHH
233	V233	len_sse	short runs emphasis	Wavelet	GLRLM	HHH
234	V234	len_lse	long runs emphasis	Wavelet	GLRLM	HHH
235	V235	len_lgse	low grey level run emphasis	Wavelet	GLRLM	HHH
236	V236	len_hgse	high grey level run emphasis	Wavelet	GLRLM	HHH
237	V237	len_sslge	short run low grey level emphasis	Wavelet	GLRLM	HHH
238	V238	len_sshge	short run high grey level emphasis	Wavelet	GLRLM	HHH
239	V239	len_lslge	long run low grey level emphasis	Wavelet	GLRLM	HHH
240	V240	len_lshge	long run high grey level emphasis	Wavelet	GLRLM	HHH
241	V241	len_rpc	run percentage	Wavelet	GLRLM	HHH
242	V242	len_grey_lev_var	grey level variance	Wavelet	GLRLM	HHH
243	V243	len_zone_size_var	run length variance	Wavelet	GLRLM	HHH
244	V244	len_size_entropy	run entropy	Wavelet	GLRLM	HHH
245	V245	M_len_intensityVar	grey level non-uniformity	Wavelet	mGLRLM	HHH
246	V246	M_len_intensityVar_n	grey level non-uniformity normalized	Wavelet	mGLRLM	HHH
247	V247	M_len_sizeVar	zone size non-uniformity	Wavelet	mGLRLM	HHH
248	V248	M_len_sizeVar_n	zone size non-uniformity normalized	Wavelet	mGLRLM	HHH
249	V249	M_len_sse	short runs emphasis	Wavelet	mGLRLM	HHH
250	V250	M_len_lse	long runs emphasis	Wavelet	mGLRLM	HHH
251	V251	M_len_lgse	low grey level run emphasis	Wavelet	mGLRLM	HHH
252	V252	M_len_hgse	high grey level run emphasis	Wavelet	mGLRLM	HHH
253	V253	M_len_sslge	short run low grey level emphasis	Wavelet	mGLRLM	HHH
254	V254	M_len_sshge	short run high grey level emphasis	Wavelet	mGLRLM	HHH
255	V255	M_len_lslge	long run low grey level emphasis	Wavelet	mGLRLM	HHH
256	V256	M_len_lshge	long run high grey level emphasis	Wavelet	mGLRLM	HHH
257	V257	M_len_rpc	run percentage	Wavelet	mGLRLM	HHH
258	V258	M_len_grey_lev_var	grey level variance	Wavelet	mGLRLM	HHH
259	V259	M_len_zone_size_var	run length variance	Wavelet	mGLRLM	HHH
260	V260	M_len_size_entropy	run entropy	Wavelet	mGLRLM	HHH
261	V261	intensityVar	grey level non-uniformity	Wavelet	GLSZM	HHH
262	V262	intensityVar_n	grey level non-uniformity normalized	Wavelet	GLSZM	HHH
263	V263	sizeVar	zone size non-uniformity	Wavelet	GLSZM	HHH
264	V264	sizeVar_n	zone size non-uniformity normalized	Wavelet	GLSZM	HHH
265	V265	sse	small zone emphasis	Wavelet	GLSZM	HHH
266	V266	lse	large zone emphasis	Wavelet	GLSZM	HHH
267	V267	lgse	low grey level zone emphasis	Wavelet	GLSZM	HHH
268	V268	hgse	high grey level zone emphasis	Wavelet	GLSZM	HHH
269	V269	sslge	small zone low grey level emphasis	Wavelet	GLSZM	HHH
270	V270	sshge	small zone high grey level emphasis	Wavelet	GLSZM	HHH
271	V271	lslge	large zone low grey level emphasis	Wavelet	GLSZM	HHH
272	V272	lshge	large zone high grey level emphasis	Wavelet	GLSZM	HHH
273	V273	rpc	zone percentage	Wavelet	GLSZM	HHH
274	V274	grey_lev_var	grey level variance	Wavelet	GLSZM	HHH
275	V275	zone_size_var	zone size variance	Wavelet	GLSZM	HHH
276	V276	size_entropy	zone size entropy	Wavelet	GLSZM	HHH
277	V277	GLDZM_intensityVar	grey level non-uniformity	Wavelet	GLDZM	HHH
278	V278	GLDZM_intensityVar_n	grey level non-uniformity normalized	Wavelet	GLDZM	HHH
279	V279	GLDZM_sizeVar	zone size non-uniformity	Wavelet	GLDZM	HHH
280	V280	GLDZM_sizeVar_n	zone size non-uniformity normalized	Wavelet	GLDZM	HHH
281	V281	GLDZM_sse	small distance emphasis	Wavelet	GLDZM	HHH
282	V282	GLDZM_lse	large distance emphasis	Wavelet	GLDZM	HHH
283	V283	GLDZM_lgse	low grey level zone emphasis	Wavelet	GLDZM	HHH
284	V284	GLDZM_hgse	high grey level zone emphasis	Wavelet	GLDZM	HHH
285	V285	GLDZM_sslge	small distance low grey level emphasis	Wavelet	GLDZM	HHH
286	V286	GLDZM_sshge	small distance high grey level emphasis	Wavelet	GLDZM	HHH
287	V287	GLDZM_lslge	large distance low grey level emphasis	Wavelet	GLDZM	HHH
288	V288	GLDZM_lshge	large distance high grey level emphasis	Wavelet	GLDZM	HHH
289	V289	GLDZM_rpc	zone percentage	Wavelet	GLDZM	HHH
290	V290	GLDZM_grey_lev_var	grey level variance	Wavelet	GLDZM	HHH
291	V291	GLDZM_zone_size_var	zone distance variance	Wavelet	GLDZM	HHH
292	V292	GLDZM_size_entropy	zone distance entropy	Wavelet	GLDZM	HHH
293	V293	NGLDM_intensityVar	grey level non-uniformity	Wavelet	NGLDM	HHH
294	V294	NGLDM_intensityVar_n	grey level non-uniformity normalized	Wavelet	NGLDM	HHH
295	V295	NGLDM_sizeVar	dependence count non-uniformity	Wavelet	NGLDM	HHH
296	V296	NGLDM_sizeVar_n	dependence count non-uniformity normalized	Wavelet	NGLDM	HHH
297	V297	NGLDM_sse	low dependence emphasis	Wavelet	NGLDM	HHH
298	V298	NGLDM_lse	high dependence emphasis	Wavelet	NGLDM	HHH
299	V299	NGLDM_lgse	low grey level count emphasis	Wavelet	NGLDM	HHH
300	V300	NGLDM_hgse	high grey level count emphasis	Wavelet	NGLDM	HHH
301	V301	NGLDM_sslge	low dependence low grey level emphasis	Wavelet	NGLDM	HHH
302	V302	NGLDM_sshge	low dependence high grey level emphasis	Wavelet	NGLDM	HHH
303	V303	NGLDM_lslge	high dependence low grey level emphasis	Wavelet	NGLDM	HHH
304	V304	NGLDM_lshge	high dependence high grey level emphasis	Wavelet	NGLDM	HHH
305	V305	NGLDM_grey_lev_var	grey level variance	Wavelet	NGLDM	HHH
306	V306	NGLDM_zone_size_var	dependence count variance	Wavelet	NGLDM	HHH
307	V307	NGLDM_size_entropy	dependence count entropy	Wavelet	NGLDM	HHH
308	V308	NGLDM_energy	dependence count energy	Wavelet	NGLDM	HHH
309	V309	Mean	mean	Wavelet	intensity	HHL
310	V310	SD	standard deviation	Wavelet	intensity	HHL
311	V311	COV	coefficient of variation	Wavelet	intensity	HHL
312	V312	skewness	skewness	Wavelet	intensity	HHL
313	V313	kurtosis	kurtosis	Wavelet	intensity	HHL
314	V314	var	variance	Wavelet	intensity	HHL
315	V315	median	median	Wavelet	intensity	HHL
316	V316	percentile10	percentile 10th	Wavelet	intensity	HHL
317	V317	percentile90	percentile 90th	Wavelet	intensity	HHL
318	V318	iqr	interquartile range	Wavelet	intensity	HHL
319	V319	Hrange	range	Wavelet	intensity	HHL
320	V320	mad	mean absolut deviation	Wavelet	intensity	HHL
321	V321	rmad	robust mean absolut deviation	Wavelet	intensity	HHL
322	V322	H_energy	energy	Wavelet	intensity	HHL
323	V323	H_entropy	entropy	Wavelet	intensity	HHL
324	V324	rms	root mean square	Wavelet	intensity	HHL
325	V325	H_uniformity	uniformity	Wavelet	intensity	HHL
326	V326	energy	energy	Wavelet	GLCM	HHL
327	V327	entropy	entropy	Wavelet	GLCM	HHL
328	V328	contrast	contrast	Wavelet	GLCM	HHL
329	V329	correlation	correlation	Wavelet	GLCM	HHL
330	V330	homogenity	homogeneity	Wavelet	GLCM	HHL
331	V331	homogenity_n	homogeneity normalized	Wavelet	GLCM	HHL
332	V332	idiff	inverese difference	Wavelet	GLCM	HHL
333	V333	idiff_n	inverese difference normalized	Wavelet	GLCM	HHL
334	V334	variance	variance	Wavelet	GLCM	HHL
335	V335	sum_average	sum of average	Wavelet	GLCM	HHL
336	V336	sum_entropy	sum of entropy	Wavelet	GLCM	HHL
337	V337	sum_variance	sum of variance	Wavelet	GLCM	HHL
338	V338	diff_entropy	difference entropy	Wavelet	GLCM	HHL
339	V339	diff_variance	difference variance	Wavelet	GLCM	HHL
340	V340	IMC1	information measures of correlation 1	Wavelet	GLCM	HHL
341	V341	IMC2	information measures of correlation 2	Wavelet	GLCM	HHL
342	V342	MCC	maximal correlation coefficient	Wavelet	GLCM	HHL
343	V343	joint_max	joint maximum	Wavelet	GLCM	HHL
344	V344	joint_average	joint average	Wavelet	GLCM	HHL
345	V345	diff_average	difference average	Wavelet	GLCM	HHL
346	V346	dissimilarity	dissimilarity	Wavelet	GLCM	HHL
347	V347	inverse_variance	inverse variance	Wavelet	GLCM	HHL
348	V348	autocorrelation	autocorrelation	Wavelet	GLCM	HHL
349	V349	clust_tendency	cluster tendency	Wavelet	GLCM	HHL
350	V350	clust_shade	cluster shade	Wavelet	GLCM	HHL
351	V351	clust_prominence	cluster prominence	Wavelet	GLCM	HHL
352	V352	M_energy	energy	Wavelet	mGLCM	HHL
353	V353	M_entropy	entropy	Wavelet	mGLCM	HHL
354	V354	M_contrast	contrast	Wavelet	mGLCM	HHL
355	V355	M_correlation	correlation	Wavelet	mGLCM	HHL
356	V356	M_homogenity	homogeneity	Wavelet	mGLCM	HHL
357	V357	M_homogenity_n	homogeneity normalized	Wavelet	mGLCM	HHL
358	V358	M_idiff	inverese difference	Wavelet	mGLCM	HHL
359	V359	M_idiff_n	inverese difference normalized	Wavelet	mGLCM	HHL
360	V360	M_variance	variance	Wavelet	mGLCM	HHL
361	V361	M_sum_average	sum of average	Wavelet	mGLCM	HHL
362	V362	M_sum_entropy	sum of entropy	Wavelet	mGLCM	HHL
363	V363	M_sum_variance	sum of variance	Wavelet	mGLCM	HHL
364	V364	M_diff_entropy	difference entropy	Wavelet	mGLCM	HHL
365	V365	M_diff_variance	difference variance	Wavelet	mGLCM	HHL
366	V366	M_IMC1	information measures of correlation 1	Wavelet	mGLCM	HHL
367	V367	M_IMC2	information measures of correlation 2	Wavelet	mGLCM	HHL
368	V368	M_MCC	maximal correlation coefficient	Wavelet	mGLCM	HHL
369	V369	M_joint_max	joint maximum	Wavelet	mGLCM	HHL
370	V370	M_joint_average	joint average	Wavelet	mGLCM	HHL
371	V371	M_diff_average	difference average	Wavelet	mGLCM	HHL
372	V372	M_dissimilarity	dissimilarity	Wavelet	mGLCM	HHL
373	V373	M_inverse_variance	inverse variance	Wavelet	mGLCM	HHL
374	V374	M_autocorrelation	autocorrelation	Wavelet	mGLCM	HHL
375	V375	M_clust_tendency	cluster tendency	Wavelet	mGLCM	HHL
376	V376	M_clust_shade	cluster shade	Wavelet	mGLCM	HHL
377	V377	M_clust_prominence	cluster prominence	Wavelet	mGLCM	HHL
378	V378	coarseness	coarseness	Wavelet	NGTDM	HHL
379	V379	neighContrast	contrast	Wavelet	NGTDM	HHL
380	V380	busyness	busyness	Wavelet	NGTDM	HHL
381	V381	complexity	complexity	Wavelet	NGTDM	HHL
382	V382	strength	strength	Wavelet	NGTDM	HHL
383	V383	len_intensityVar	grey level non-uniformity	Wavelet	GLRLM	HHL
384	V384	len_intensityVar_n	grey level non-uniformity normalized	Wavelet	GLRLM	HHL
385	V385	len_sizeVar	zone size non-uniformity	Wavelet	GLRLM	HHL
386	V386	len_sizeVar_n	zone size non-uniformity normalized	Wavelet	GLRLM	HHL
387	V387	len_sse	short runs emphasis	Wavelet	GLRLM	HHL
388	V388	len_lse	long runs emphasis	Wavelet	GLRLM	HHL
389	V389	len_lgse	low grey level run emphasis	Wavelet	GLRLM	HHL
390	V390	len_hgse	high grey level run emphasis	Wavelet	GLRLM	HHL
391	V391	len_sslge	short run low grey level emphasis	Wavelet	GLRLM	HHL
392	V392	len_sshge	short run high grey level emphasis	Wavelet	GLRLM	HHL
393	V393	len_lslge	long run low grey level emphasis	Wavelet	GLRLM	HHL
394	V394	len_lshge	long run high grey level emphasis	Wavelet	GLRLM	HHL
395	V395	len_rpc	run percentage	Wavelet	GLRLM	HHL
396	V396	len_grey_lev_var	grey level variance	Wavelet	GLRLM	HHL
397	V397	len_zone_size_var	run length variance	Wavelet	GLRLM	HHL
398	V398	len_size_entropy	run entropy	Wavelet	GLRLM	HHL
399	V399	M_len_intensityVar	grey level non-uniformity	Wavelet	mGLRLM	HHL
400	V400	M_len_intensityVar_n	grey level non-uniformity normalized	Wavelet	mGLRLM	HHL
401	V401	M_len_sizeVar	zone size non-uniformity	Wavelet	mGLRLM	HHL
402	V402	M_len_sizeVar_n	zone size non-uniformity normalized	Wavelet	mGLRLM	HHL
403	V403	M_len_sse	short runs emphasis	Wavelet	mGLRLM	HHL
404	V404	M_len_lse	long runs emphasis	Wavelet	mGLRLM	HHL
405	V405	M_len_lgse	low grey level run emphasis	Wavelet	mGLRLM	HHL
406	V406	M_len_hgse	high grey level run emphasis	Wavelet	mGLRLM	HHL
407	V407	M_len_sslge	short run low grey level emphasis	Wavelet	mGLRLM	HHL
408	V408	M_len_sshge	short run high grey level emphasis	Wavelet	mGLRLM	HHL
409	V409	M_len_lslge	long run low grey level emphasis	Wavelet	mGLRLM	HHL
410	V410	M_len_lshge	long run high grey level emphasis	Wavelet	mGLRLM	HHL
411	V411	M_len_rpc	run percentage	Wavelet	mGLRLM	HHL
412	V412	M_len_grey_lev_var	grey level variance	Wavelet	mGLRLM	HHL
413	V413	M_len_zone_size_var	run length variance	Wavelet	mGLRLM	HHL
414	V414	M_len_size_entropy	run entropy	Wavelet	mGLRLM	HHL
415	V415	intensityVar	grey level non-uniformity	Wavelet	GLSZM	HHL
416	V416	intensityVar_n	grey level non-uniformity normalized	Wavelet	GLSZM	HHL
417	V417	sizeVar	zone size non-uniformity	Wavelet	GLSZM	HHL
418	V418	sizeVar_n	zone size non-uniformity normalized	Wavelet	GLSZM	HHL
419	V419	sse	small zone emphasis	Wavelet	GLSZM	HHL
420	V420	lse	large zone emphasis	Wavelet	GLSZM	HHL
421	V421	lgse	low grey level zone emphasis	Wavelet	GLSZM	HHL
422	V422	hgse	high grey level zone emphasis	Wavelet	GLSZM	HHL
423	V423	sslge	small zone low grey level emphasis	Wavelet	GLSZM	HHL
424	V424	sshge	small zone high grey level emphasis	Wavelet	GLSZM	HHL
425	V425	lslge	large zone low grey level emphasis	Wavelet	GLSZM	HHL
426	V426	lshge	large zone high grey level emphasis	Wavelet	GLSZM	HHL
427	V427	rpc	zone percentage	Wavelet	GLSZM	HHL
428	V428	grey_lev_var	grey level variance	Wavelet	GLSZM	HHL
429	V429	zone_size_var	zone size variance	Wavelet	GLSZM	HHL
430	V430	size_entropy	zone size entropy	Wavelet	GLSZM	HHL
431	V431	GLDZM_intensityVar	grey level non-uniformity	Wavelet	GLDZM	HHL
432	V432	GLDZM_intensityVar_n	grey level non-uniformity normalized	Wavelet	GLDZM	HHL
433	V433	GLDZM_sizeVar	zone size non-uniformity	Wavelet	GLDZM	HHL
434	V434	GLDZM_sizeVar_n	zone size non-uniformity normalized	Wavelet	GLDZM	HHL
435	V435	GLDZM_sse	small distance emphasis	Wavelet	GLDZM	HHL
436	V436	GLDZM_lse	large distance emphasis	Wavelet	GLDZM	HHL
437	V437	GLDZM_lgse	low grey level zone emphasis	Wavelet	GLDZM	HHL
438	V438	GLDZM_hgse	high grey level zone emphasis	Wavelet	GLDZM	HHL
439	V439	GLDZM_sslge	small distance low grey level emphasis	Wavelet	GLDZM	HHL
440	V440	GLDZM_sshge	small distance high grey level emphasis	Wavelet	GLDZM	HHL
441	V441	GLDZM_lslge	large distance low grey level emphasis	Wavelet	GLDZM	HHL
442	V442	GLDZM_lshge	large distance high grey level emphasis	Wavelet	GLDZM	HHL
443	V443	GLDZM_rpc	zone percentage	Wavelet	GLDZM	HHL
444	V444	GLDZM_grey_lev_var	grey level variance	Wavelet	GLDZM	HHL
445	V445	GLDZM_zone_size_var	zone distance variance	Wavelet	GLDZM	HHL
446	V446	GLDZM_size_entropy	zone distance entropy	Wavelet	GLDZM	HHL
447	V447	NGLDM_intensityVar	grey level non-uniformity	Wavelet	NGLDM	HHL
448	V448	NGLDM_intensityVar_n	grey level non-uniformity normalized	Wavelet	NGLDM	HHL
449	V449	NGLDM_sizeVar	dependence count non-uniformity	Wavelet	NGLDM	HHL
450	V450	NGLDM_sizeVar_n	dependence count non-uniformity normalized	Wavelet	NGLDM	HHL
451	V451	NGLDM_sse	low dependence emphasis	Wavelet	NGLDM	HHL
452	V452	NGLDM_lse	high dependence emphasis	Wavelet	NGLDM	HHL
453	V453	NGLDM_lgse	low grey level count emphasis	Wavelet	NGLDM	HHL
454	V454	NGLDM_hgse	high grey level count emphasis	Wavelet	NGLDM	HHL
455	V455	NGLDM_sslge	low dependence low grey level emphasis	Wavelet	NGLDM	HHL
456	V456	NGLDM_sshge	low dependence high grey level emphasis	Wavelet	NGLDM	HHL
457	V457	NGLDM_lslge	high dependence low grey level emphasis	Wavelet	NGLDM	HHL
458	V458	NGLDM_lshge	high dependence high grey level emphasis	Wavelet	NGLDM	HHL
459	V459	NGLDM_grey_lev_var	grey level variance	Wavelet	NGLDM	HHL
460	V460	NGLDM_zone_size_var	dependence count variance	Wavelet	NGLDM	HHL
461	V461	NGLDM_size_entropy	dependence count entropy	Wavelet	NGLDM	HHL
462	V462	NGLDM_energy	dependence count energy	Wavelet	NGLDM	HHL
463	V463	Mean	mean	Wavelet	intensity	HLH
464	V464	SD	standard deviation	Wavelet	intensity	HLH
465	V465	COV	coefficient of variation	Wavelet	intensity	HLH
466	V466	skewness	skewness	Wavelet	intensity	HLH
467	V467	kurtosis	kurtosis	Wavelet	intensity	HLH
468	V468	var	variance	Wavelet	intensity	HLH
469	V469	median	median	Wavelet	intensity	HLH
470	V470	percentile10	percentile 10th	Wavelet	intensity	HLH
471	V471	percentile90	percentile 90th	Wavelet	intensity	HLH
472	V472	iqr	interquartile range	Wavelet	intensity	HLH
473	V473	Hrange	range	Wavelet	intensity	HLH
474	V474	mad	mean absolut deviation	Wavelet	intensity	HLH
475	V475	rmad	robust mean absolut deviation	Wavelet	intensity	HLH
476	V476	H_energy	energy	Wavelet	intensity	HLH
477	V477	H_entropy	entropy	Wavelet	intensity	HLH
478	V478	rms	root mean square	Wavelet	intensity	HLH
479	V479	H_uniformity	uniformity	Wavelet	intensity	HLH
480	V480	energy	energy	Wavelet	GLCM	HLH
481	V481	entropy	entropy	Wavelet	GLCM	HLH
482	V482	contrast	contrast	Wavelet	GLCM	HLH
483	V483	correlation	correlation	Wavelet	GLCM	HLH
484	V484	homogenity	homogeneity	Wavelet	GLCM	HLH
485	V485	homogenity_n	homogeneity normalized	Wavelet	GLCM	HLH
486	V486	idiff	inverese difference	Wavelet	GLCM	HLH
487	V487	idiff_n	inverese difference normalized	Wavelet	GLCM	HLH
488	V488	variance	variance	Wavelet	GLCM	HLH
489	V489	sum_average	sum of average	Wavelet	GLCM	HLH
490	V490	sum_entropy	sum of entropy	Wavelet	GLCM	HLH
491	V491	sum_variance	sum of variance	Wavelet	GLCM	HLH
492	V492	diff_entropy	difference entropy	Wavelet	GLCM	HLH
493	V493	diff_variance	difference variance	Wavelet	GLCM	HLH
494	V494	IMC1	information measures of correlation 1	Wavelet	GLCM	HLH
495	V495	IMC2	information measures of correlation 2	Wavelet	GLCM	HLH
496	V496	MCC	maximal correlation coefficient	Wavelet	GLCM	HLH
497	V497	joint_max	joint maximum	Wavelet	GLCM	HLH
498	V498	joint_average	joint average	Wavelet	GLCM	HLH
499	V499	diff_average	difference average	Wavelet	GLCM	HLH
500	V500	dissimilarity	dissimilarity	Wavelet	GLCM	HLH
501	V501	inverse_variance	inverse variance	Wavelet	GLCM	HLH
502	V502	autocorrelation	autocorrelation	Wavelet	GLCM	HLH
503	V503	clust_tendency	cluster tendency	Wavelet	GLCM	HLH
504	V504	clust_shade	cluster shade	Wavelet	GLCM	HLH
505	V505	clust_prominence	cluster prominence	Wavelet	GLCM	HLH
506	V506	M_energy	energy	Wavelet	mGLCM	HLH
507	V507	M_entropy	entropy	Wavelet	mGLCM	HLH
508	V508	M_contrast	contrast	Wavelet	mGLCM	HLH
509	V509	M_correlation	correlation	Wavelet	mGLCM	HLH
510	V510	M_homogenity	homogeneity	Wavelet	mGLCM	HLH
511	V511	M_homogenity_n	homogeneity normalized	Wavelet	mGLCM	HLH
512	V512	M_idiff	inverese difference	Wavelet	mGLCM	HLH
513	V513	M_idiff_n	inverese difference normalized	Wavelet	mGLCM	HLH
514	V514	M_variance	variance	Wavelet	mGLCM	HLH
515	V515	M_sum_average	sum of average	Wavelet	mGLCM	HLH
516	V516	M_sum_entropy	sum of entropy	Wavelet	mGLCM	HLH
517	V517	M_sum_variance	sum of variance	Wavelet	mGLCM	HLH
518	V518	M_diff_entropy	difference entropy	Wavelet	mGLCM	HLH
519	V519	M_diff_variance	difference variance	Wavelet	mGLCM	HLH
520	V520	M_IMC1	information measures of correlation 1	Wavelet	mGLCM	HLH
521	V521	M_IMC2	information measures of correlation 2	Wavelet	mGLCM	HLH
522	V522	M_MCC	maximal correlation coefficient	Wavelet	mGLCM	HLH
523	V523	M_joint_max	joint maximum	Wavelet	mGLCM	HLH
524	V524	M_joint_average	joint average	Wavelet	mGLCM	HLH
525	V525	M_diff_average	difference average	Wavelet	mGLCM	HLH
526	V526	M_dissimilarity	dissimilarity	Wavelet	mGLCM	HLH
527	V527	M_inverse_variance	inverse variance	Wavelet	mGLCM	HLH
528	V528	M_autocorrelation	autocorrelation	Wavelet	mGLCM	HLH
529	V529	M_clust_tendency	cluster tendency	Wavelet	mGLCM	HLH
530	V530	M_clust_shade	cluster shade	Wavelet	mGLCM	HLH
531	V531	M_clust_prominence	cluster prominence	Wavelet	mGLCM	HLH
532	V532	coarseness	coarseness	Wavelet	NGTDM	HLH
533	V533	neighContrast	contrast	Wavelet	NGTDM	HLH
534	V534	busyness	busyness	Wavelet	NGTDM	HLH
535	V535	complexity	complexity	Wavelet	NGTDM	HLH
536	V536	strength	strength	Wavelet	NGTDM	HLH
537	V537	len_intensityVar	grey level non-uniformity	Wavelet	GLRLM	HLH
538	V538	len_intensityVar_n	grey level non-uniformity normalized	Wavelet	GLRLM	HLH
539	V539	len_sizeVar	zone size non-uniformity	Wavelet	GLRLM	HLH
540	V540	len_sizeVar_n	zone size non-uniformity normalized	Wavelet	GLRLM	HLH
541	V541	len_sse	short runs emphasis	Wavelet	GLRLM	HLH
542	V542	len_lse	long runs emphasis	Wavelet	GLRLM	HLH
543	V543	len_lgse	low grey level run emphasis	Wavelet	GLRLM	HLH
544	V544	len_hgse	high grey level run emphasis	Wavelet	GLRLM	HLH
545	V545	len_sslge	short run low grey level emphasis	Wavelet	GLRLM	HLH
546	V546	len_sshge	short run high grey level emphasis	Wavelet	GLRLM	HLH
547	V547	len_lslge	long run low grey level emphasis	Wavelet	GLRLM	HLH
548	V548	len_lshge	long run high grey level emphasis	Wavelet	GLRLM	HLH
549	V549	len_rpc	run percentage	Wavelet	GLRLM	HLH
550	V550	len_grey_lev_var	grey level variance	Wavelet	GLRLM	HLH
551	V551	len_zone_size_var	run length variance	Wavelet	GLRLM	HLH
552	V552	len_size_entropy	run entropy	Wavelet	GLRLM	HLH
553	V553	M_len_intensityVar	grey level non-uniformity	Wavelet	mGLRLM	HLH
554	V554	M_len_intensityVar_n	grey level non-uniformity normalized	Wavelet	mGLRLM	HLH
555	V555	M_len_sizeVar	zone size non-uniformity	Wavelet	mGLRLM	HLH
556	V556	M_len_sizeVar_n	zone size non-uniformity normalized	Wavelet	mGLRLM	HLH
557	V557	M_len_sse	short runs emphasis	Wavelet	mGLRLM	HLH
558	V558	M_len_lse	long runs emphasis	Wavelet	mGLRLM	HLH
559	V559	M_len_lgse	low grey level run emphasis	Wavelet	mGLRLM	HLH
560	V560	M_len_hgse	high grey level run emphasis	Wavelet	mGLRLM	HLH
561	V561	M_len_sslge	short run low grey level emphasis	Wavelet	mGLRLM	HLH
562	V562	M_len_sshge	short run high grey level emphasis	Wavelet	mGLRLM	HLH
563	V563	M_len_lslge	long run low grey level emphasis	Wavelet	mGLRLM	HLH
564	V564	M_len_lshge	long run high grey level emphasis	Wavelet	mGLRLM	HLH
565	V565	M_len_rpc	run percentage	Wavelet	mGLRLM	HLH
566	V566	M_len_grey_lev_var	grey level variance	Wavelet	mGLRLM	HLH
567	V567	M_len_zone_size_var	run length variance	Wavelet	mGLRLM	HLH
568	V568	M_len_size_entropy	run entropy	Wavelet	mGLRLM	HLH
569	V569	intensityVar	grey level non-uniformity	Wavelet	GLSZM	HLH
570	V570	intensityVar_n	grey level non-uniformity normalized	Wavelet	GLSZM	HLH
571	V571	sizeVar	zone size non-uniformity	Wavelet	GLSZM	HLH
572	V572	sizeVar_n	zone size non-uniformity normalized	Wavelet	GLSZM	HLH
573	V573	sse	small zone emphasis	Wavelet	GLSZM	HLH
574	V574	lse	large zone emphasis	Wavelet	GLSZM	HLH
575	V575	lgse	low grey level zone emphasis	Wavelet	GLSZM	HLH
576	V576	hgse	high grey level zone emphasis	Wavelet	GLSZM	HLH
577	V577	sslge	small zone low grey level emphasis	Wavelet	GLSZM	HLH
578	V578	sshge	small zone high grey level emphasis	Wavelet	GLSZM	HLH
579	V579	lslge	large zone low grey level emphasis	Wavelet	GLSZM	HLH
580	V580	lshge	large zone high grey level emphasis	Wavelet	GLSZM	HLH
581	V581	rpc	zone percentage	Wavelet	GLSZM	HLH
582	V582	grey_lev_var	grey level variance	Wavelet	GLSZM	HLH
583	V583	zone_size_var	zone size variance	Wavelet	GLSZM	HLH
584	V584	size_entropy	zone size entropy	Wavelet	GLSZM	HLH
585	V585	GLDZM_intensityVar	grey level non-uniformity	Wavelet	GLDZM	HLH
586	V586	GLDZM_intensityVar_n	grey level non-uniformity normalized	Wavelet	GLDZM	HLH
587	V587	GLDZM_sizeVar	zone size non-uniformity	Wavelet	GLDZM	HLH
588	V588	GLDZM_sizeVar_n	zone size non-uniformity normalized	Wavelet	GLDZM	HLH
589	V589	GLDZM_sse	small distance emphasis	Wavelet	GLDZM	HLH
590	V590	GLDZM_lse	large distance emphasis	Wavelet	GLDZM	HLH
591	V591	GLDZM_lgse	low grey level zone emphasis	Wavelet	GLDZM	HLH
592	V592	GLDZM_hgse	high grey level zone emphasis	Wavelet	GLDZM	HLH
593	V593	GLDZM_sslge	small distance low grey level emphasis	Wavelet	GLDZM	HLH
594	V594	GLDZM_sshge	small distance high grey level emphasis	Wavelet	GLDZM	HLH
595	V595	GLDZM_lslge	large distance low grey level emphasis	Wavelet	GLDZM	HLH
596	V596	GLDZM_lshge	large distance high grey level emphasis	Wavelet	GLDZM	HLH
597	V597	GLDZM_rpc	zone percentage	Wavelet	GLDZM	HLH
598	V598	GLDZM_grey_lev_var	grey level variance	Wavelet	GLDZM	HLH
599	V599	GLDZM_zone_size_var	zone distance variance	Wavelet	GLDZM	HLH
600	V600	GLDZM_size_entropy	zone distance entropy	Wavelet	GLDZM	HLH
601	V601	NGLDM_intensityVar	grey level non-uniformity	Wavelet	NGLDM	HLH
602	V602	NGLDM_intensityVar_n	grey level non-uniformity normalized	Wavelet	NGLDM	HLH
603	V603	NGLDM_sizeVar	dependence count non-uniformity	Wavelet	NGLDM	HLH
604	V604	NGLDM_sizeVar_n	dependence count non-uniformity normalized	Wavelet	NGLDM	HLH
605	V605	NGLDM_sse	low dependence emphasis	Wavelet	NGLDM	HLH
606	V606	NGLDM_lse	high dependence emphasis	Wavelet	NGLDM	HLH
607	V607	NGLDM_lgse	low grey level count emphasis	Wavelet	NGLDM	HLH
608	V608	NGLDM_hgse	high grey level count emphasis	Wavelet	NGLDM	HLH
609	V609	NGLDM_sslge	low dependence low grey level emphasis	Wavelet	NGLDM	HLH
610	V610	NGLDM_sshge	low dependence high grey level emphasis	Wavelet	NGLDM	HLH
611	V611	NGLDM_lslge	high dependence low grey level emphasis	Wavelet	NGLDM	HLH
612	V612	NGLDM_lshge	high dependence high grey level emphasis	Wavelet	NGLDM	HLH
613	V613	NGLDM_grey_lev_var	grey level variance	Wavelet	NGLDM	HLH
614	V614	NGLDM_zone_size_var	dependence count variance	Wavelet	NGLDM	HLH
615	V615	NGLDM_size_entropy	dependence count entropy	Wavelet	NGLDM	HLH
616	V616	NGLDM_energy	dependence count energy	Wavelet	NGLDM	HLH
617	V617	Mean	mean	Wavelet	intensity	HLL
618	V618	SD	standard deviation	Wavelet	intensity	HLL
619	V619	COV	coefficient of variation	Wavelet	intensity	HLL
620	V620	skewness	skewness	Wavelet	intensity	HLL
621	V621	kurtosis	kurtosis	Wavelet	intensity	HLL
622	V622	var	variance	Wavelet	intensity	HLL
623	V623	median	median	Wavelet	intensity	HLL
624	V624	percentile10	percentile 10th	Wavelet	intensity	HLL
625	V625	percentile90	percentile 90th	Wavelet	intensity	HLL
626	V626	iqr	interquartile range	Wavelet	intensity	HLL
627	V627	Hrange	range	Wavelet	intensity	HLL
628	V628	mad	mean absolut deviation	Wavelet	intensity	HLL
629	V629	rmad	robust mean absolut deviation	Wavelet	intensity	HLL
630	V630	H_energy	energy	Wavelet	intensity	HLL
631	V631	H_entropy	entropy	Wavelet	intensity	HLL
632	V632	rms	root mean square	Wavelet	intensity	HLL
633	V633	H_uniformity	uniformity	Wavelet	intensity	HLL
634	V634	energy	energy	Wavelet	GLCM	HLL
635	V635	entropy	entropy	Wavelet	GLCM	HLL
636	V636	contrast	contrast	Wavelet	GLCM	HLL
637	V637	correlation	correlation	Wavelet	GLCM	HLL
638	V638	homogenity	homogeneity	Wavelet	GLCM	HLL
639	V639	homogenity_n	homogeneity normalized	Wavelet	GLCM	HLL
640	V640	idiff	inverese difference	Wavelet	GLCM	HLL
641	V641	idiff_n	inverese difference normalized	Wavelet	GLCM	HLL
642	V642	variance	variance	Wavelet	GLCM	HLL
643	V643	sum_average	sum of average	Wavelet	GLCM	HLL
644	V644	sum_entropy	sum of entropy	Wavelet	GLCM	HLL
645	V645	sum_variance	sum of variance	Wavelet	GLCM	HLL
646	V646	diff_entropy	difference entropy	Wavelet	GLCM	HLL
647	V647	diff_variance	difference variance	Wavelet	GLCM	HLL
648	V648	IMC1	information measures of correlation 1	Wavelet	GLCM	HLL
649	V649	IMC2	information measures of correlation 2	Wavelet	GLCM	HLL
650	V650	MCC	maximal correlation coefficient	Wavelet	GLCM	HLL
651	V651	joint_max	joint maximum	Wavelet	GLCM	HLL
652	V652	joint_average	joint average	Wavelet	GLCM	HLL
653	V653	diff_average	difference average	Wavelet	GLCM	HLL
654	V654	dissimilarity	dissimilarity	Wavelet	GLCM	HLL
655	V655	inverse_variance	inverse variance	Wavelet	GLCM	HLL
656	V656	autocorrelation	autocorrelation	Wavelet	GLCM	HLL
657	V657	clust_tendency	cluster tendency	Wavelet	GLCM	HLL
658	V658	clust_shade	cluster shade	Wavelet	GLCM	HLL
659	V659	clust_prominence	cluster prominence	Wavelet	GLCM	HLL
660	V660	M_energy	energy	Wavelet	mGLCM	HLL
661	V661	M_entropy	entropy	Wavelet	mGLCM	HLL
662	V662	M_contrast	contrast	Wavelet	mGLCM	HLL
663	V663	M_correlation	correlation	Wavelet	mGLCM	HLL
664	V664	M_homogenity	homogeneity	Wavelet	mGLCM	HLL
665	V665	M_homogenity_n	homogeneity normalized	Wavelet	mGLCM	HLL
666	V666	M_idiff	inverese difference	Wavelet	mGLCM	HLL
667	V667	M_idiff_n	inverese difference normalized	Wavelet	mGLCM	HLL
668	V668	M_variance	variance	Wavelet	mGLCM	HLL
669	V669	M_sum_average	sum of average	Wavelet	mGLCM	HLL
670	V670	M_sum_entropy	sum of entropy	Wavelet	mGLCM	HLL
671	V671	M_sum_variance	sum of variance	Wavelet	mGLCM	HLL
672	V672	M_diff_entropy	difference entropy	Wavelet	mGLCM	HLL
673	V673	M_diff_variance	difference variance	Wavelet	mGLCM	HLL
674	V674	M_IMC1	information measures of correlation 1	Wavelet	mGLCM	HLL
675	V675	M_IMC2	information measures of correlation 2	Wavelet	mGLCM	HLL
676	V676	M_MCC	maximal correlation coefficient	Wavelet	mGLCM	HLL
677	V677	M_joint_max	joint maximum	Wavelet	mGLCM	HLL
678	V678	M_joint_average	joint average	Wavelet	mGLCM	HLL
679	V679	M_diff_average	difference average	Wavelet	mGLCM	HLL
680	V680	M_dissimilarity	dissimilarity	Wavelet	mGLCM	HLL
681	V681	M_inverse_variance	inverse variance	Wavelet	mGLCM	HLL
682	V682	M_autocorrelation	autocorrelation	Wavelet	mGLCM	HLL
683	V683	M_clust_tendency	cluster tendency	Wavelet	mGLCM	HLL
684	V684	M_clust_shade	cluster shade	Wavelet	mGLCM	HLL
685	V685	M_clust_prominence	cluster prominence	Wavelet	mGLCM	HLL
686	V686	coarseness	coarseness	Wavelet	NGTDM	HLL
687	V687	neighContrast	contrast	Wavelet	NGTDM	HLL
688	V688	busyness	busyness	Wavelet	NGTDM	HLL
689	V689	complexity	complexity	Wavelet	NGTDM	HLL
690	V690	strength	strength	Wavelet	NGTDM	HLL
691	V691	len_intensityVar	grey level non-uniformity	Wavelet	GLRLM	HLL
692	V692	len_intensityVar_n	grey level non-uniformity normalized	Wavelet	GLRLM	HLL
693	V693	len_sizeVar	zone size non-uniformity	Wavelet	GLRLM	HLL
694	V694	len_sizeVar_n	zone size non-uniformity normalized	Wavelet	GLRLM	HLL
695	V695	len_sse	short runs emphasis	Wavelet	GLRLM	HLL
696	V696	len_lse	long runs emphasis	Wavelet	GLRLM	HLL
697	V697	len_lgse	low grey level run emphasis	Wavelet	GLRLM	HLL
698	V698	len_hgse	high grey level run emphasis	Wavelet	GLRLM	HLL
699	V699	len_sslge	short run low grey level emphasis	Wavelet	GLRLM	HLL
700	V700	len_sshge	short run high grey level emphasis	Wavelet	GLRLM	HLL
701	V701	len_lslge	long run low grey level emphasis	Wavelet	GLRLM	HLL
702	V702	len_lshge	long run high grey level emphasis	Wavelet	GLRLM	HLL
703	V703	len_rpc	run percentage	Wavelet	GLRLM	HLL
704	V704	len_grey_lev_var	grey level variance	Wavelet	GLRLM	HLL
705	V705	len_zone_size_var	run length variance	Wavelet	GLRLM	HLL
706	V706	len_size_entropy	run entropy	Wavelet	GLRLM	HLL
707	V707	M_len_intensityVar	grey level non-uniformity	Wavelet	mGLRLM	HLL
708	V708	M_len_intensityVar_n	grey level non-uniformity normalized	Wavelet	mGLRLM	HLL
709	V709	M_len_sizeVar	zone size non-uniformity	Wavelet	mGLRLM	HLL
710	V710	M_len_sizeVar_n	zone size non-uniformity normalized	Wavelet	mGLRLM	HLL
711	V711	M_len_sse	short runs emphasis	Wavelet	mGLRLM	HLL
712	V712	M_len_lse	long runs emphasis	Wavelet	mGLRLM	HLL
713	V713	M_len_lgse	low grey level run emphasis	Wavelet	mGLRLM	HLL
714	V714	M_len_hgse	high grey level run emphasis	Wavelet	mGLRLM	HLL
715	V715	M_len_sslge	short run low grey level emphasis	Wavelet	mGLRLM	HLL
716	V716	M_len_sshge	short run high grey level emphasis	Wavelet	mGLRLM	HLL
717	V717	M_len_lslge	long run low grey level emphasis	Wavelet	mGLRLM	HLL
718	V718	M_len_lshge	long run high grey level emphasis	Wavelet	mGLRLM	HLL
719	V719	M_len_rpc	run percentage	Wavelet	mGLRLM	HLL
720	V720	M_len_grey_lev_var	grey level variance	Wavelet	mGLRLM	HLL
721	V721	M_len_zone_size_var	run length variance	Wavelet	mGLRLM	HLL
722	V722	M_len_size_entropy	run entropy	Wavelet	mGLRLM	HLL
723	V723	intensityVar	grey level non-uniformity	Wavelet	GLSZM	HLL
724	V724	intensityVar_n	grey level non-uniformity normalized	Wavelet	GLSZM	HLL
725	V725	sizeVar	zone size non-uniformity	Wavelet	GLSZM	HLL
726	V726	sizeVar_n	zone size non-uniformity normalized	Wavelet	GLSZM	HLL
727	V727	sse	small zone emphasis	Wavelet	GLSZM	HLL
728	V728	lse	large zone emphasis	Wavelet	GLSZM	HLL
729	V729	lgse	low grey level zone emphasis	Wavelet	GLSZM	HLL
730	V730	hgse	high grey level zone emphasis	Wavelet	GLSZM	HLL
731	V731	sslge	small zone low grey level emphasis	Wavelet	GLSZM	HLL
732	V732	sshge	small zone high grey level emphasis	Wavelet	GLSZM	HLL
733	V733	lslge	large zone low grey level emphasis	Wavelet	GLSZM	HLL
734	V734	lshge	large zone high grey level emphasis	Wavelet	GLSZM	HLL
735	V735	rpc	zone percentage	Wavelet	GLSZM	HLL
736	V736	grey_lev_var	grey level variance	Wavelet	GLSZM	HLL
737	V737	zone_size_var	zone size variance	Wavelet	GLSZM	HLL
738	V738	size_entropy	zone size entropy	Wavelet	GLSZM	HLL
739	V739	GLDZM_intensityVar	grey level non-uniformity	Wavelet	GLDZM	HLL
740	V740	GLDZM_intensityVar_n	grey level non-uniformity normalized	Wavelet	GLDZM	HLL
741	V741	GLDZM_sizeVar	zone size non-uniformity	Wavelet	GLDZM	HLL
742	V742	GLDZM_sizeVar_n	zone size non-uniformity normalized	Wavelet	GLDZM	HLL
743	V743	GLDZM_sse	small distance emphasis	Wavelet	GLDZM	HLL
744	V744	GLDZM_lse	large distance emphasis	Wavelet	GLDZM	HLL
745	V745	GLDZM_lgse	low grey level zone emphasis	Wavelet	GLDZM	HLL
746	V746	GLDZM_hgse	high grey level zone emphasis	Wavelet	GLDZM	HLL
747	V747	GLDZM_sslge	small distance low grey level emphasis	Wavelet	GLDZM	HLL
748	V748	GLDZM_sshge	small distance high grey level emphasis	Wavelet	GLDZM	HLL
749	V749	GLDZM_lslge	large distance low grey level emphasis	Wavelet	GLDZM	HLL
750	V750	GLDZM_lshge	large distance high grey level emphasis	Wavelet	GLDZM	HLL
751	V751	GLDZM_rpc	zone percentage	Wavelet	GLDZM	HLL
752	V752	GLDZM_grey_lev_var	grey level variance	Wavelet	GLDZM	HLL
753	V753	GLDZM_zone_size_var	zone distance variance	Wavelet	GLDZM	HLL
754	V754	GLDZM_size_entropy	zone distance entropy	Wavelet	GLDZM	HLL
755	V755	NGLDM_intensityVar	grey level non-uniformity	Wavelet	NGLDM	HLL
756	V756	NGLDM_intensityVar_n	grey level non-uniformity normalized	Wavelet	NGLDM	HLL
757	V757	NGLDM_sizeVar	dependence count non-uniformity	Wavelet	NGLDM	HLL
758	V758	NGLDM_sizeVar_n	dependence count non-uniformity normalized	Wavelet	NGLDM	HLL
759	V759	NGLDM_sse	low dependence emphasis	Wavelet	NGLDM	HLL
760	V760	NGLDM_lse	high dependence emphasis	Wavelet	NGLDM	HLL
761	V761	NGLDM_lgse	low grey level count emphasis	Wavelet	NGLDM	HLL
762	V762	NGLDM_hgse	high grey level count emphasis	Wavelet	NGLDM	HLL
763	V763	NGLDM_sslge	low dependence low grey level emphasis	Wavelet	NGLDM	HLL
764	V764	NGLDM_sshge	low dependence high grey level emphasis	Wavelet	NGLDM	HLL
765	V765	NGLDM_lslge	high dependence low grey level emphasis	Wavelet	NGLDM	HLL
766	V766	NGLDM_lshge	high dependence high grey level emphasis	Wavelet	NGLDM	HLL
767	V767	NGLDM_grey_lev_var	grey level variance	Wavelet	NGLDM	HLL
768	V768	NGLDM_zone_size_var	dependence count variance	Wavelet	NGLDM	HLL
769	V769	NGLDM_size_entropy	dependence count entropy	Wavelet	NGLDM	HLL
770	V770	NGLDM_energy	dependence count energy	Wavelet	NGLDM	HLL
771	V771	Mean	mean	Wavelet	intensity	LHH
772	V772	SD	standard deviation	Wavelet	intensity	LHH
773	V773	COV	coefficient of variation	Wavelet	intensity	LHH
774	V774	skewness	skewness	Wavelet	intensity	LHH
775	V775	kurtosis	kurtosis	Wavelet	intensity	LHH
776	V776	var	variance	Wavelet	intensity	LHH
777	V777	median	median	Wavelet	intensity	LHH
778	V778	percentile10	percentile 10th	Wavelet	intensity	LHH
779	V779	percentile90	percentile 90th	Wavelet	intensity	LHH
780	V780	iqr	interquartile range	Wavelet	intensity	LHH
781	V781	Hrange	range	Wavelet	intensity	LHH
782	V782	mad	mean absolut deviation	Wavelet	intensity	LHH
783	V783	rmad	robust mean absolut deviation	Wavelet	intensity	LHH
784	V784	H_energy	energy	Wavelet	intensity	LHH
785	V785	H_entropy	entropy	Wavelet	intensity	LHH
786	V786	rms	root mean square	Wavelet	intensity	LHH
787	V787	H_uniformity	uniformity	Wavelet	intensity	LHH
788	V788	energy	energy	Wavelet	GLCM	LHH
789	V789	entropy	entropy	Wavelet	GLCM	LHH
790	V790	contrast	contrast	Wavelet	GLCM	LHH
791	V791	correlation	correlation	Wavelet	GLCM	LHH
792	V792	homogenity	homogeneity	Wavelet	GLCM	LHH
793	V793	homogenity_n	homogeneity normalized	Wavelet	GLCM	LHH
794	V794	idiff	inverese difference	Wavelet	GLCM	LHH
795	V795	idiff_n	inverese difference normalized	Wavelet	GLCM	LHH
796	V796	variance	variance	Wavelet	GLCM	LHH
797	V797	sum_average	sum of average	Wavelet	GLCM	LHH
798	V798	sum_entropy	sum of entropy	Wavelet	GLCM	LHH
799	V799	sum_variance	sum of variance	Wavelet	GLCM	LHH
800	V800	diff_entropy	difference entropy	Wavelet	GLCM	LHH
801	V801	diff_variance	difference variance	Wavelet	GLCM	LHH
802	V802	IMC1	information measures of correlation 1	Wavelet	GLCM	LHH
803	V803	IMC2	information measures of correlation 2	Wavelet	GLCM	LHH
804	V804	MCC	maximal correlation coefficient	Wavelet	GLCM	LHH
805	V805	joint_max	joint maximum	Wavelet	GLCM	LHH
806	V806	joint_average	joint average	Wavelet	GLCM	LHH
807	V807	diff_average	difference average	Wavelet	GLCM	LHH
808	V808	dissimilarity	dissimilarity	Wavelet	GLCM	LHH
809	V809	inverse_variance	inverse variance	Wavelet	GLCM	LHH
810	V810	autocorrelation	autocorrelation	Wavelet	GLCM	LHH
811	V811	clust_tendency	cluster tendency	Wavelet	GLCM	LHH
812	V812	clust_shade	cluster shade	Wavelet	GLCM	LHH
813	V813	clust_prominence	cluster prominence	Wavelet	GLCM	LHH
814	V814	M_energy	energy	Wavelet	mGLCM	LHH
815	V815	M_entropy	entropy	Wavelet	mGLCM	LHH
816	V816	M_contrast	contrast	Wavelet	mGLCM	LHH
817	V817	M_correlation	correlation	Wavelet	mGLCM	LHH
818	V818	M_homogenity	homogeneity	Wavelet	mGLCM	LHH
819	V819	M_homogenity_n	homogeneity normalized	Wavelet	mGLCM	LHH
820	V820	M_idiff	inverese difference	Wavelet	mGLCM	LHH
821	V821	M_idiff_n	inverese difference normalized	Wavelet	mGLCM	LHH
822	V822	M_variance	variance	Wavelet	mGLCM	LHH
823	V823	M_sum_average	sum of average	Wavelet	mGLCM	LHH
824	V824	M_sum_entropy	sum of entropy	Wavelet	mGLCM	LHH
825	V825	M_sum_variance	sum of variance	Wavelet	mGLCM	LHH
826	V826	M_diff_entropy	difference entropy	Wavelet	mGLCM	LHH
827	V827	M_diff_variance	difference variance	Wavelet	mGLCM	LHH
828	V828	M_IMC1	information measures of correlation 1	Wavelet	mGLCM	LHH
829	V829	M_IMC2	information measures of correlation 2	Wavelet	mGLCM	LHH
830	V830	M_MCC	maximal correlation coefficient	Wavelet	mGLCM	LHH
831	V831	M_joint_max	joint maximum	Wavelet	mGLCM	LHH
832	V832	M_joint_average	joint average	Wavelet	mGLCM	LHH
833	V833	M_diff_average	difference average	Wavelet	mGLCM	LHH
834	V834	M_dissimilarity	dissimilarity	Wavelet	mGLCM	LHH
835	V835	M_inverse_variance	inverse variance	Wavelet	mGLCM	LHH
836	V836	M_autocorrelation	autocorrelation	Wavelet	mGLCM	LHH
837	V837	M_clust_tendency	cluster tendency	Wavelet	mGLCM	LHH
838	V838	M_clust_shade	cluster shade	Wavelet	mGLCM	LHH
839	V839	M_clust_prominence	cluster prominence	Wavelet	mGLCM	LHH
840	V840	coarseness	coarseness	Wavelet	NGTDM	LHH
841	V841	neighContrast	contrast	Wavelet	NGTDM	LHH
842	V842	busyness	busyness	Wavelet	NGTDM	LHH
843	V843	complexity	complexity	Wavelet	NGTDM	LHH
844	V844	strength	strength	Wavelet	NGTDM	LHH
845	V845	len_intensityVar	grey level non-uniformity	Wavelet	GLRLM	LHH
846	V846	len_intensityVar_n	grey level non-uniformity normalized	Wavelet	GLRLM	LHH
847	V847	len_sizeVar	zone size non-uniformity	Wavelet	GLRLM	LHH
848	V848	len_sizeVar_n	zone size non-uniformity normalized	Wavelet	GLRLM	LHH
849	V849	len_sse	short runs emphasis	Wavelet	GLRLM	LHH
850	V850	len_lse	long runs emphasis	Wavelet	GLRLM	LHH
851	V851	len_lgse	low grey level run emphasis	Wavelet	GLRLM	LHH
852	V852	len_hgse	high grey level run emphasis	Wavelet	GLRLM	LHH
853	V853	len_sslge	short run low grey level emphasis	Wavelet	GLRLM	LHH
854	V854	len_sshge	short run high grey level emphasis	Wavelet	GLRLM	LHH
855	V855	len_lslge	long run low grey level emphasis	Wavelet	GLRLM	LHH
856	V856	len_lshge	long run high grey level emphasis	Wavelet	GLRLM	LHH
857	V857	len_rpc	run percentage	Wavelet	GLRLM	LHH
858	V858	len_grey_lev_var	grey level variance	Wavelet	GLRLM	LHH
859	V859	len_zone_size_var	run length variance	Wavelet	GLRLM	LHH
860	V860	len_size_entropy	run entropy	Wavelet	GLRLM	LHH
861	V861	M_len_intensityVar	grey level non-uniformity	Wavelet	mGLRLM	LHH
862	V862	M_len_intensityVar_n	grey level non-uniformity normalized	Wavelet	mGLRLM	LHH
863	V863	M_len_sizeVar	zone size non-uniformity	Wavelet	mGLRLM	LHH
864	V864	M_len_sizeVar_n	zone size non-uniformity normalized	Wavelet	mGLRLM	LHH
865	V865	M_len_sse	short runs emphasis	Wavelet	mGLRLM	LHH
866	V866	M_len_lse	long runs emphasis	Wavelet	mGLRLM	LHH
867	V867	M_len_lgse	low grey level run emphasis	Wavelet	mGLRLM	LHH
868	V868	M_len_hgse	high grey level run emphasis	Wavelet	mGLRLM	LHH
869	V869	M_len_sslge	short run low grey level emphasis	Wavelet	mGLRLM	LHH
870	V870	M_len_sshge	short run high grey level emphasis	Wavelet	mGLRLM	LHH
871	V871	M_len_lslge	long run low grey level emphasis	Wavelet	mGLRLM	LHH
872	V872	M_len_lshge	long run high grey level emphasis	Wavelet	mGLRLM	LHH
873	V873	M_len_rpc	run percentage	Wavelet	mGLRLM	LHH
874	V874	M_len_grey_lev_var	grey level variance	Wavelet	mGLRLM	LHH
875	V875	M_len_zone_size_var	run length variance	Wavelet	mGLRLM	LHH
876	V876	M_len_size_entropy	run entropy	Wavelet	mGLRLM	LHH
877	V877	intensityVar	grey level non-uniformity	Wavelet	GLSZM	LHH
878	V878	intensityVar_n	grey level non-uniformity normalized	Wavelet	GLSZM	LHH
879	V879	sizeVar	zone size non-uniformity	Wavelet	GLSZM	LHH
880	V880	sizeVar_n	zone size non-uniformity normalized	Wavelet	GLSZM	LHH
881	V881	sse	small zone emphasis	Wavelet	GLSZM	LHH
882	V882	lse	large zone emphasis	Wavelet	GLSZM	LHH
883	V883	lgse	low grey level zone emphasis	Wavelet	GLSZM	LHH
884	V884	hgse	high grey level zone emphasis	Wavelet	GLSZM	LHH
885	V885	sslge	small zone low grey level emphasis	Wavelet	GLSZM	LHH
886	V886	sshge	small zone high grey level emphasis	Wavelet	GLSZM	LHH
887	V887	lslge	large zone low grey level emphasis	Wavelet	GLSZM	LHH
888	V888	lshge	large zone high grey level emphasis	Wavelet	GLSZM	LHH
889	V889	rpc	zone percentage	Wavelet	GLSZM	LHH
890	V890	grey_lev_var	grey level variance	Wavelet	GLSZM	LHH
891	V891	zone_size_var	zone size variance	Wavelet	GLSZM	LHH
892	V892	size_entropy	zone size entropy	Wavelet	GLSZM	LHH
893	V893	GLDZM_intensityVar	grey level non-uniformity	Wavelet	GLDZM	LHH
894	V894	GLDZM_intensityVar_n	grey level non-uniformity normalized	Wavelet	GLDZM	LHH
895	V895	GLDZM_sizeVar	zone size non-uniformity	Wavelet	GLDZM	LHH
896	V896	GLDZM_sizeVar_n	zone size non-uniformity normalized	Wavelet	GLDZM	LHH
897	V897	GLDZM_sse	small distance emphasis	Wavelet	GLDZM	LHH
898	V898	GLDZM_lse	large distance emphasis	Wavelet	GLDZM	LHH
899	V899	GLDZM_lgse	low grey level zone emphasis	Wavelet	GLDZM	LHH
900	V900	GLDZM_hgse	high grey level zone emphasis	Wavelet	GLDZM	LHH
901	V901	GLDZM_sslge	small distance low grey level emphasis	Wavelet	GLDZM	LHH
902	V902	GLDZM_sshge	small distance high grey level emphasis	Wavelet	GLDZM	LHH
903	V903	GLDZM_lslge	large distance low grey level emphasis	Wavelet	GLDZM	LHH
904	V904	GLDZM_lshge	large distance high grey level emphasis	Wavelet	GLDZM	LHH
905	V905	GLDZM_rpc	zone percentage	Wavelet	GLDZM	LHH
906	V906	GLDZM_grey_lev_var	grey level variance	Wavelet	GLDZM	LHH
907	V907	GLDZM_zone_size_var	zone distance variance	Wavelet	GLDZM	LHH
908	V908	GLDZM_size_entropy	zone distance entropy	Wavelet	GLDZM	LHH
909	V909	NGLDM_intensityVar	grey level non-uniformity	Wavelet	NGLDM	LHH
910	V910	NGLDM_intensityVar_n	grey level non-uniformity normalized	Wavelet	NGLDM	LHH
911	V911	NGLDM_sizeVar	dependence count non-uniformity	Wavelet	NGLDM	LHH
912	V912	NGLDM_sizeVar_n	dependence count non-uniformity normalized	Wavelet	NGLDM	LHH
913	V913	NGLDM_sse	low dependence emphasis	Wavelet	NGLDM	LHH
914	V914	NGLDM_lse	high dependence emphasis	Wavelet	NGLDM	LHH
915	V915	NGLDM_lgse	low grey level count emphasis	Wavelet	NGLDM	LHH
916	V916	NGLDM_hgse	high grey level count emphasis	Wavelet	NGLDM	LHH
917	V917	NGLDM_sslge	low dependence low grey level emphasis	Wavelet	NGLDM	LHH
918	V918	NGLDM_sshge	low dependence high grey level emphasis	Wavelet	NGLDM	LHH
919	V919	NGLDM_lslge	high dependence low grey level emphasis	Wavelet	NGLDM	LHH
920	V920	NGLDM_lshge	high dependence high grey level emphasis	Wavelet	NGLDM	LHH
921	V921	NGLDM_grey_lev_var	grey level variance	Wavelet	NGLDM	LHH
922	V922	NGLDM_zone_size_var	dependence count variance	Wavelet	NGLDM	LHH
923	V923	NGLDM_size_entropy	dependence count entropy	Wavelet	NGLDM	LHH
924	V924	NGLDM_energy	dependence count energy	Wavelet	NGLDM	LHH
925	V925	Mean	mean	Wavelet	intensity	LHL
926	V926	SD	standard deviation	Wavelet	intensity	LHL
927	V927	COV	coefficient of variation	Wavelet	intensity	LHL
928	V928	skewness	skewness	Wavelet	intensity	LHL
929	V929	kurtosis	kurtosis	Wavelet	intensity	LHL
930	V930	var	variance	Wavelet	intensity	LHL
931	V931	median	median	Wavelet	intensity	LHL
932	V932	percentile10	percentile 10th	Wavelet	intensity	LHL
933	V933	percentile90	percentile 90th	Wavelet	intensity	LHL
934	V934	iqr	interquartile range	Wavelet	intensity	LHL
935	V935	Hrange	range	Wavelet	intensity	LHL
936	V936	mad	mean absolut deviation	Wavelet	intensity	LHL
937	V937	rmad	robust mean absolut deviation	Wavelet	intensity	LHL
938	V938	H_energy	energy	Wavelet	intensity	LHL
939	V939	H_entropy	entropy	Wavelet	intensity	LHL
940	V940	rms	root mean square	Wavelet	intensity	LHL
941	V941	H_uniformity	uniformity	Wavelet	intensity	LHL
942	V942	energy	energy	Wavelet	GLCM	LHL
943	V943	entropy	entropy	Wavelet	GLCM	LHL
944	V944	contrast	contrast	Wavelet	GLCM	LHL
945	V945	correlation	correlation	Wavelet	GLCM	LHL
946	V946	homogenity	homogeneity	Wavelet	GLCM	LHL
947	V947	homogenity_n	homogeneity normalized	Wavelet	GLCM	LHL
948	V948	idiff	inverese difference	Wavelet	GLCM	LHL
949	V949	idiff_n	inverese difference normalized	Wavelet	GLCM	LHL
950	V950	variance	variance	Wavelet	GLCM	LHL
951	V951	sum_average	sum of average	Wavelet	GLCM	LHL
952	V952	sum_entropy	sum of entropy	Wavelet	GLCM	LHL
953	V953	sum_variance	sum of variance	Wavelet	GLCM	LHL
954	V954	diff_entropy	difference entropy	Wavelet	GLCM	LHL
955	V955	diff_variance	difference variance	Wavelet	GLCM	LHL
956	V956	IMC1	information measures of correlation 1	Wavelet	GLCM	LHL
957	V957	IMC2	information measures of correlation 2	Wavelet	GLCM	LHL
958	V958	MCC	maximal correlation coefficient	Wavelet	GLCM	LHL
959	V959	joint_max	joint maximum	Wavelet	GLCM	LHL
960	V960	joint_average	joint average	Wavelet	GLCM	LHL
961	V961	diff_average	difference average	Wavelet	GLCM	LHL
962	V962	dissimilarity	dissimilarity	Wavelet	GLCM	LHL
963	V963	inverse_variance	inverse variance	Wavelet	GLCM	LHL
964	V964	autocorrelation	autocorrelation	Wavelet	GLCM	LHL
965	V965	clust_tendency	cluster tendency	Wavelet	GLCM	LHL
966	V966	clust_shade	cluster shade	Wavelet	GLCM	LHL
967	V967	clust_prominence	cluster prominence	Wavelet	GLCM	LHL
968	V968	M_energy	energy	Wavelet	mGLCM	LHL
969	V969	M_entropy	entropy	Wavelet	mGLCM	LHL
970	V970	M_contrast	contrast	Wavelet	mGLCM	LHL
971	V971	M_correlation	correlation	Wavelet	mGLCM	LHL
972	V972	M_homogenity	homogeneity	Wavelet	mGLCM	LHL
973	V973	M_homogenity_n	homogeneity normalized	Wavelet	mGLCM	LHL
974	V974	M_idiff	inverese difference	Wavelet	mGLCM	LHL
975	V975	M_idiff_n	inverese difference normalized	Wavelet	mGLCM	LHL
976	V976	M_variance	variance	Wavelet	mGLCM	LHL
977	V977	M_sum_average	sum of average	Wavelet	mGLCM	LHL
978	V978	M_sum_entropy	sum of entropy	Wavelet	mGLCM	LHL
979	V979	M_sum_variance	sum of variance	Wavelet	mGLCM	LHL
980	V980	M_diff_entropy	difference entropy	Wavelet	mGLCM	LHL
981	V981	M_diff_variance	difference variance	Wavelet	mGLCM	LHL
982	V982	M_IMC1	information measures of correlation 1	Wavelet	mGLCM	LHL
983	V983	M_IMC2	information measures of correlation 2	Wavelet	mGLCM	LHL
984	V984	M_MCC	maximal correlation coefficient	Wavelet	mGLCM	LHL
985	V985	M_joint_max	joint maximum	Wavelet	mGLCM	LHL
986	V986	M_joint_average	joint average	Wavelet	mGLCM	LHL
987	V987	M_diff_average	difference average	Wavelet	mGLCM	LHL
988	V988	M_dissimilarity	dissimilarity	Wavelet	mGLCM	LHL
989	V989	M_inverse_variance	inverse variance	Wavelet	mGLCM	LHL
990	V990	M_autocorrelation	autocorrelation	Wavelet	mGLCM	LHL
991	V991	M_clust_tendency	cluster tendency	Wavelet	mGLCM	LHL
992	V992	M_clust_shade	cluster shade	Wavelet	mGLCM	LHL
993	V993	M_clust_prominence	cluster prominence	Wavelet	mGLCM	LHL
994	V994	coarseness	coarseness	Wavelet	NGTDM	LHL
995	V995	neighContrast	contrast	Wavelet	NGTDM	LHL
996	V996	busyness	busyness	Wavelet	NGTDM	LHL
997	V997	complexity	complexity	Wavelet	NGTDM	LHL
998	V998	strength	strength	Wavelet	NGTDM	LHL
999	V999	len_intensityVar	grey level non-uniformity	Wavelet	GLRLM	LHL
1000	V1000	len_intensityVar_n	grey level non-uniformity normalized	Wavelet	GLRLM	LHL
1001	V1001	len_sizeVar	zone size non-uniformity	Wavelet	GLRLM	LHL
1002	V1002	len_sizeVar_n	zone size non-uniformity normalized	Wavelet	GLRLM	LHL
1003	V1003	len_sse	short runs emphasis	Wavelet	GLRLM	LHL
1004	V1004	len_lse	long runs emphasis	Wavelet	GLRLM	LHL
1005	V1005	len_lgse	low grey level run emphasis	Wavelet	GLRLM	LHL
1006	V1006	len_hgse	high grey level run emphasis	Wavelet	GLRLM	LHL
1007	V1007	len_sslge	short run low grey level emphasis	Wavelet	GLRLM	LHL
1008	V1008	len_sshge	short run high grey level emphasis	Wavelet	GLRLM	LHL
1009	V1009	len_lslge	long run low grey level emphasis	Wavelet	GLRLM	LHL
1010	V1010	len_lshge	long run high grey level emphasis	Wavelet	GLRLM	LHL
1011	V1011	len_rpc	run percentage	Wavelet	GLRLM	LHL
1012	V1012	len_grey_lev_var	grey level variance	Wavelet	GLRLM	LHL
1013	V1013	len_zone_size_var	run length variance	Wavelet	GLRLM	LHL
1014	V1014	len_size_entropy	run entropy	Wavelet	GLRLM	LHL
1015	V1015	M_len_intensityVar	grey level non-uniformity	Wavelet	mGLRLM	LHL
1016	V1016	M_len_intensityVar_n	grey level non-uniformity normalized	Wavelet	mGLRLM	LHL
1017	V1017	M_len_sizeVar	zone size non-uniformity	Wavelet	mGLRLM	LHL
1018	V1018	M_len_sizeVar_n	zone size non-uniformity normalized	Wavelet	mGLRLM	LHL
1019	V1019	M_len_sse	short runs emphasis	Wavelet	mGLRLM	LHL
1020	V1020	M_len_lse	long runs emphasis	Wavelet	mGLRLM	LHL
1021	V1021	M_len_lgse	low grey level run emphasis	Wavelet	mGLRLM	LHL
1022	V1022	M_len_hgse	high grey level run emphasis	Wavelet	mGLRLM	LHL
1023	V1023	M_len_sslge	short run low grey level emphasis	Wavelet	mGLRLM	LHL
1024	V1024	M_len_sshge	short run high grey level emphasis	Wavelet	mGLRLM	LHL
1025	V1025	M_len_lslge	long run low grey level emphasis	Wavelet	mGLRLM	LHL
1026	V1026	M_len_lshge	long run high grey level emphasis	Wavelet	mGLRLM	LHL
1027	V1027	M_len_rpc	run percentage	Wavelet	mGLRLM	LHL
1028	V1028	M_len_grey_lev_var	grey level variance	Wavelet	mGLRLM	LHL
1029	V1029	M_len_zone_size_var	run length variance	Wavelet	mGLRLM	LHL
1030	V1030	M_len_size_entropy	run entropy	Wavelet	mGLRLM	LHL
1031	V1031	intensityVar	grey level non-uniformity	Wavelet	GLSZM	LHL
1032	V1032	intensityVar_n	grey level non-uniformity normalized	Wavelet	GLSZM	LHL
1033	V1033	sizeVar	zone size non-uniformity	Wavelet	GLSZM	LHL
1034	V1034	sizeVar_n	zone size non-uniformity normalized	Wavelet	GLSZM	LHL
1035	V1035	sse	small zone emphasis	Wavelet	GLSZM	LHL
1036	V1036	lse	large zone emphasis	Wavelet	GLSZM	LHL
1037	V1037	lgse	low grey level zone emphasis	Wavelet	GLSZM	LHL
1038	V1038	hgse	high grey level zone emphasis	Wavelet	GLSZM	LHL
1039	V1039	sslge	small zone low grey level emphasis	Wavelet	GLSZM	LHL
1040	V1040	sshge	small zone high grey level emphasis	Wavelet	GLSZM	LHL
1041	V1041	lslge	large zone low grey level emphasis	Wavelet	GLSZM	LHL
1042	V1042	lshge	large zone high grey level emphasis	Wavelet	GLSZM	LHL
1043	V1043	rpc	zone percentage	Wavelet	GLSZM	LHL
1044	V1044	grey_lev_var	grey level variance	Wavelet	GLSZM	LHL
1045	V1045	zone_size_var	zone size variance	Wavelet	GLSZM	LHL
1046	V1046	size_entropy	zone size entropy	Wavelet	GLSZM	LHL
1047	V1047	GLDZM_intensityVar	grey level non-uniformity	Wavelet	GLDZM	LHL
1048	V1048	GLDZM_intensityVar_n	grey level non-uniformity normalized	Wavelet	GLDZM	LHL
1049	V1049	GLDZM_sizeVar	zone size non-uniformity	Wavelet	GLDZM	LHL
1050	V1050	GLDZM_sizeVar_n	zone size non-uniformity normalized	Wavelet	GLDZM	LHL
1051	V1051	GLDZM_sse	small distance emphasis	Wavelet	GLDZM	LHL
1052	V1052	GLDZM_lse	large distance emphasis	Wavelet	GLDZM	LHL
1053	V1053	GLDZM_lgse	low grey level zone emphasis	Wavelet	GLDZM	LHL
1054	V1054	GLDZM_hgse	high grey level zone emphasis	Wavelet	GLDZM	LHL
1055	V1055	GLDZM_sslge	small distance low grey level emphasis	Wavelet	GLDZM	LHL
1056	V1056	GLDZM_sshge	small distance high grey level emphasis	Wavelet	GLDZM	LHL
1057	V1057	GLDZM_lslge	large distance low grey level emphasis	Wavelet	GLDZM	LHL
1058	V1058	GLDZM_lshge	large distance high grey level emphasis	Wavelet	GLDZM	LHL
1059	V1059	GLDZM_rpc	zone percentage	Wavelet	GLDZM	LHL
1060	V1060	GLDZM_grey_lev_var	grey level variance	Wavelet	GLDZM	LHL
1061	V1061	GLDZM_zone_size_var	zone distance variance	Wavelet	GLDZM	LHL
1062	V1062	GLDZM_size_entropy	zone distance entropy	Wavelet	GLDZM	LHL
1063	V1063	NGLDM_intensityVar	grey level non-uniformity	Wavelet	NGLDM	LHL
1064	V1064	NGLDM_intensityVar_n	grey level non-uniformity normalized	Wavelet	NGLDM	LHL
1065	V1065	NGLDM_sizeVar	dependence count non-uniformity	Wavelet	NGLDM	LHL
1066	V1066	NGLDM_sizeVar_n	dependence count non-uniformity normalized	Wavelet	NGLDM	LHL
1067	V1067	NGLDM_sse	low dependence emphasis	Wavelet	NGLDM	LHL
1068	V1068	NGLDM_lse	high dependence emphasis	Wavelet	NGLDM	LHL
1069	V1069	NGLDM_lgse	low grey level count emphasis	Wavelet	NGLDM	LHL
1070	V1070	NGLDM_hgse	high grey level count emphasis	Wavelet	NGLDM	LHL
1071	V1071	NGLDM_sslge	low dependence low grey level emphasis	Wavelet	NGLDM	LHL
1072	V1072	NGLDM_sshge	low dependence high grey level emphasis	Wavelet	NGLDM	LHL
1073	V1073	NGLDM_lslge	high dependence low grey level emphasis	Wavelet	NGLDM	LHL
1074	V1074	NGLDM_lshge	high dependence high grey level emphasis	Wavelet	NGLDM	LHL
1075	V1075	NGLDM_grey_lev_var	grey level variance	Wavelet	NGLDM	LHL
1076	V1076	NGLDM_zone_size_var	dependence count variance	Wavelet	NGLDM	LHL
1077	V1077	NGLDM_size_entropy	dependence count entropy	Wavelet	NGLDM	LHL
1078	V1078	NGLDM_energy	dependence count energy	Wavelet	NGLDM	LHL
1079	V1079	Mean	mean	Wavelet	intensity	LLH
1080	V1080	SD	standard deviation	Wavelet	intensity	LLH
1081	V1081	COV	coefficient of variation	Wavelet	intensity	LLH
1082	V1082	skewness	skewness	Wavelet	intensity	LLH
1083	V1083	kurtosis	kurtosis	Wavelet	intensity	LLH
1084	V1084	var	variance	Wavelet	intensity	LLH
1085	V1085	median	median	Wavelet	intensity	LLH
1086	V1086	percentile10	percentile 10th	Wavelet	intensity	LLH
1087	V1087	percentile90	percentile 90th	Wavelet	intensity	LLH
1088	V1088	iqr	interquartile range	Wavelet	intensity	LLH
1089	V1089	Hrange	range	Wavelet	intensity	LLH
1090	V1090	mad	mean absolut deviation	Wavelet	intensity	LLH
1091	V1091	rmad	robust mean absolut deviation	Wavelet	intensity	LLH
1092	V1092	H_energy	energy	Wavelet	intensity	LLH
1093	V1093	H_entropy	entropy	Wavelet	intensity	LLH
1094	V1094	rms	root mean square	Wavelet	intensity	LLH
1095	V1095	H_uniformity	uniformity	Wavelet	intensity	LLH
1096	V1096	energy	energy	Wavelet	GLCM	LLH
1097	V1097	entropy	entropy	Wavelet	GLCM	LLH
1098	V1098	contrast	contrast	Wavelet	GLCM	LLH
1099	V1099	correlation	correlation	Wavelet	GLCM	LLH
1100	V1100	homogenity	homogeneity	Wavelet	GLCM	LLH
1101	V1101	homogenity_n	homogeneity normalized	Wavelet	GLCM	LLH
1102	V1102	idiff	inverese difference	Wavelet	GLCM	LLH
1103	V1103	idiff_n	inverese difference normalized	Wavelet	GLCM	LLH
1104	V1104	variance	variance	Wavelet	GLCM	LLH
1105	V1105	sum_average	sum of average	Wavelet	GLCM	LLH
1106	V1106	sum_entropy	sum of entropy	Wavelet	GLCM	LLH
1107	V1107	sum_variance	sum of variance	Wavelet	GLCM	LLH
1108	V1108	diff_entropy	difference entropy	Wavelet	GLCM	LLH
1109	V1109	diff_variance	difference variance	Wavelet	GLCM	LLH
1110	V1110	IMC1	information measures of correlation 1	Wavelet	GLCM	LLH
1111	V1111	IMC2	information measures of correlation 2	Wavelet	GLCM	LLH
1112	V1112	MCC	maximal correlation coefficient	Wavelet	GLCM	LLH
1113	V1113	joint_max	joint maximum	Wavelet	GLCM	LLH
1114	V1114	joint_average	joint average	Wavelet	GLCM	LLH
1115	V1115	diff_average	difference average	Wavelet	GLCM	LLH
1116	V1116	dissimilarity	dissimilarity	Wavelet	GLCM	LLH
1117	V1117	inverse_variance	inverse variance	Wavelet	GLCM	LLH
1118	V1118	autocorrelation	autocorrelation	Wavelet	GLCM	LLH
1119	V1119	clust_tendency	cluster tendency	Wavelet	GLCM	LLH
1120	V1120	clust_shade	cluster shade	Wavelet	GLCM	LLH
1121	V1121	clust_prominence	cluster prominence	Wavelet	GLCM	LLH
1122	V1122	M_energy	energy	Wavelet	mGLCM	LLH
1123	V1123	M_entropy	entropy	Wavelet	mGLCM	LLH
1124	V1124	M_contrast	contrast	Wavelet	mGLCM	LLH
1125	V1125	M_correlation	correlation	Wavelet	mGLCM	LLH
1126	V1126	M_homogenity	homogeneity	Wavelet	mGLCM	LLH
1127	V1127	M_homogenity_n	homogeneity normalized	Wavelet	mGLCM	LLH
1128	V1128	M_idiff	inverese difference	Wavelet	mGLCM	LLH
1129	V1129	M_idiff_n	inverese difference normalized	Wavelet	mGLCM	LLH
1130	V1130	M_variance	variance	Wavelet	mGLCM	LLH
1131	V1131	M_sum_average	sum of average	Wavelet	mGLCM	LLH
1132	V1132	M_sum_entropy	sum of entropy	Wavelet	mGLCM	LLH
1133	V1133	M_sum_variance	sum of variance	Wavelet	mGLCM	LLH
1134	V1134	M_diff_entropy	difference entropy	Wavelet	mGLCM	LLH
1135	V1135	M_diff_variance	difference variance	Wavelet	mGLCM	LLH
1136	V1136	M_IMC1	information measures of correlation 1	Wavelet	mGLCM	LLH
1137	V1137	M_IMC2	information measures of correlation 2	Wavelet	mGLCM	LLH
1138	V1138	M_MCC	maximal correlation coefficient	Wavelet	mGLCM	LLH
1139	V1139	M_joint_max	joint maximum	Wavelet	mGLCM	LLH
1140	V1140	M_joint_average	joint average	Wavelet	mGLCM	LLH
1141	V1141	M_diff_average	difference average	Wavelet	mGLCM	LLH
1142	V1142	M_dissimilarity	dissimilarity	Wavelet	mGLCM	LLH
1143	V1143	M_inverse_variance	inverse variance	Wavelet	mGLCM	LLH
1144	V1144	M_autocorrelation	autocorrelation	Wavelet	mGLCM	LLH
1145	V1145	M_clust_tendency	cluster tendency	Wavelet	mGLCM	LLH
1146	V1146	M_clust_shade	cluster shade	Wavelet	mGLCM	LLH
1147	V1147	M_clust_prominence	cluster prominence	Wavelet	mGLCM	LLH
1148	V1148	coarseness	coarseness	Wavelet	NGTDM	LLH
1149	V1149	neighContrast	contrast	Wavelet	NGTDM	LLH
1150	V1150	busyness	busyness	Wavelet	NGTDM	LLH
1151	V1151	complexity	complexity	Wavelet	NGTDM	LLH
1152	V1152	strength	strength	Wavelet	NGTDM	LLH
1153	V1153	len_intensityVar	grey level non-uniformity	Wavelet	GLRLM	LLH
1154	V1154	len_intensityVar_n	grey level non-uniformity normalized	Wavelet	GLRLM	LLH
1155	V1155	len_sizeVar	zone size non-uniformity	Wavelet	GLRLM	LLH
1156	V1156	len_sizeVar_n	zone size non-uniformity normalized	Wavelet	GLRLM	LLH
1157	V1157	len_sse	short runs emphasis	Wavelet	GLRLM	LLH
1158	V1158	len_lse	long runs emphasis	Wavelet	GLRLM	LLH
1159	V1159	len_lgse	low grey level run emphasis	Wavelet	GLRLM	LLH
1160	V1160	len_hgse	high grey level run emphasis	Wavelet	GLRLM	LLH
1161	V1161	len_sslge	short run low grey level emphasis	Wavelet	GLRLM	LLH
1162	V1162	len_sshge	short run high grey level emphasis	Wavelet	GLRLM	LLH
1163	V1163	len_lslge	long run low grey level emphasis	Wavelet	GLRLM	LLH
1164	V1164	len_lshge	long run high grey level emphasis	Wavelet	GLRLM	LLH
1165	V1165	len_rpc	run percentage	Wavelet	GLRLM	LLH
1166	V1166	len_grey_lev_var	grey level variance	Wavelet	GLRLM	LLH
1167	V1167	len_zone_size_var	run length variance	Wavelet	GLRLM	LLH
1168	V1168	len_size_entropy	run entropy	Wavelet	GLRLM	LLH
1169	V1169	M_len_intensityVar	grey level non-uniformity	Wavelet	mGLRLM	LLH
1170	V1170	M_len_intensityVar_n	grey level non-uniformity normalized	Wavelet	mGLRLM	LLH
1171	V1171	M_len_sizeVar	zone size non-uniformity	Wavelet	mGLRLM	LLH
1172	V1172	M_len_sizeVar_n	zone size non-uniformity normalized	Wavelet	mGLRLM	LLH
1173	V1173	M_len_sse	short runs emphasis	Wavelet	mGLRLM	LLH
1174	V1174	M_len_lse	long runs emphasis	Wavelet	mGLRLM	LLH
1175	V1175	M_len_lgse	low grey level run emphasis	Wavelet	mGLRLM	LLH
1176	V1176	M_len_hgse	high grey level run emphasis	Wavelet	mGLRLM	LLH
1177	V1177	M_len_sslge	short run low grey level emphasis	Wavelet	mGLRLM	LLH
1178	V1178	M_len_sshge	short run high grey level emphasis	Wavelet	mGLRLM	LLH
1179	V1179	M_len_lslge	long run low grey level emphasis	Wavelet	mGLRLM	LLH
1180	V1180	M_len_lshge	long run high grey level emphasis	Wavelet	mGLRLM	LLH
1181	V1181	M_len_rpc	run percentage	Wavelet	mGLRLM	LLH
1182	V1182	M_len_grey_lev_var	grey level variance	Wavelet	mGLRLM	LLH
1183	V1183	M_len_zone_size_var	run length variance	Wavelet	mGLRLM	LLH
1184	V1184	M_len_size_entropy	run entropy	Wavelet	mGLRLM	LLH
1185	V1185	intensityVar	grey level non-uniformity	Wavelet	GLSZM	LLH
1186	V1186	intensityVar_n	grey level non-uniformity normalized	Wavelet	GLSZM	LLH
1187	V1187	sizeVar	zone size non-uniformity	Wavelet	GLSZM	LLH
1188	V1188	sizeVar_n	zone size non-uniformity normalized	Wavelet	GLSZM	LLH
1189	V1189	sse	small zone emphasis	Wavelet	GLSZM	LLH
1190	V1190	lse	large zone emphasis	Wavelet	GLSZM	LLH
1191	V1191	lgse	low grey level zone emphasis	Wavelet	GLSZM	LLH
1192	V1192	hgse	high grey level zone emphasis	Wavelet	GLSZM	LLH
1193	V1193	sslge	small zone low grey level emphasis	Wavelet	GLSZM	LLH
1194	V1194	sshge	small zone high grey level emphasis	Wavelet	GLSZM	LLH
1195	V1195	lslge	large zone low grey level emphasis	Wavelet	GLSZM	LLH
1196	V1196	lshge	large zone high grey level emphasis	Wavelet	GLSZM	LLH
1197	V1197	rpc	zone percentage	Wavelet	GLSZM	LLH
1198	V1198	grey_lev_var	grey level variance	Wavelet	GLSZM	LLH
1199	V1199	zone_size_var	zone size variance	Wavelet	GLSZM	LLH
1200	V1200	size_entropy	zone size entropy	Wavelet	GLSZM	LLH
1201	V1201	GLDZM_intensityVar	grey level non-uniformity	Wavelet	GLDZM	LLH
1202	V1202	GLDZM_intensityVar_n	grey level non-uniformity normalized	Wavelet	GLDZM	LLH
1203	V1203	GLDZM_sizeVar	zone size non-uniformity	Wavelet	GLDZM	LLH
1204	V1204	GLDZM_sizeVar_n	zone size non-uniformity normalized	Wavelet	GLDZM	LLH
1205	V1205	GLDZM_sse	small distance emphasis	Wavelet	GLDZM	LLH
1206	V1206	GLDZM_lse	large distance emphasis	Wavelet	GLDZM	LLH
1207	V1207	GLDZM_lgse	low grey level zone emphasis	Wavelet	GLDZM	LLH
1208	V1208	GLDZM_hgse	high grey level zone emphasis	Wavelet	GLDZM	LLH
1209	V1209	GLDZM_sslge	small distance low grey level emphasis	Wavelet	GLDZM	LLH
1210	V1210	GLDZM_sshge	small distance high grey level emphasis	Wavelet	GLDZM	LLH
1211	V1211	GLDZM_lslge	large distance low grey level emphasis	Wavelet	GLDZM	LLH
1212	V1212	GLDZM_lshge	large distance high grey level emphasis	Wavelet	GLDZM	LLH
1213	V1213	GLDZM_rpc	zone percentage	Wavelet	GLDZM	LLH
1214	V1214	GLDZM_grey_lev_var	grey level variance	Wavelet	GLDZM	LLH
1215	V1215	GLDZM_zone_size_var	zone distance variance	Wavelet	GLDZM	LLH
1216	V1216	GLDZM_size_entropy	zone distance entropy	Wavelet	GLDZM	LLH
1217	V1217	NGLDM_intensityVar	grey level non-uniformity	Wavelet	NGLDM	LLH
1218	V1218	NGLDM_intensityVar_n	grey level non-uniformity normalized	Wavelet	NGLDM	LLH
1219	V1219	NGLDM_sizeVar	dependence count non-uniformity	Wavelet	NGLDM	LLH
1220	V1220	NGLDM_sizeVar_n	dependence count non-uniformity normalized	Wavelet	NGLDM	LLH
1221	V1221	NGLDM_sse	low dependence emphasis	Wavelet	NGLDM	LLH
1222	V1222	NGLDM_lse	high dependence emphasis	Wavelet	NGLDM	LLH
1223	V1223	NGLDM_lgse	low grey level count emphasis	Wavelet	NGLDM	LLH
1224	V1224	NGLDM_hgse	high grey level count emphasis	Wavelet	NGLDM	LLH
1225	V1225	NGLDM_sslge	low dependence low grey level emphasis	Wavelet	NGLDM	LLH
1226	V1226	NGLDM_sshge	low dependence high grey level emphasis	Wavelet	NGLDM	LLH
1227	V1227	NGLDM_lslge	high dependence low grey level emphasis	Wavelet	NGLDM	LLH
1228	V1228	NGLDM_lshge	high dependence high grey level emphasis	Wavelet	NGLDM	LLH
1229	V1229	NGLDM_grey_lev_var	grey level variance	Wavelet	NGLDM	LLH
1230	V1230	NGLDM_zone_size_var	dependence count variance	Wavelet	NGLDM	LLH
1231	V1231	NGLDM_size_entropy	dependence count entropy	Wavelet	NGLDM	LLH
1232	V1232	NGLDM_energy	dependence count energy	Wavelet	NGLDM	LLH
1233	V1233	Mean	mean	Wavelet	intensity	LLL
1234	V1234	SD	standard deviation	Wavelet	intensity	LLL
1235	V1235	COV	coefficient of variation	Wavelet	intensity	LLL
1236	V1236	skewness	skewness	Wavelet	intensity	LLL
1237	V1237	kurtosis	kurtosis	Wavelet	intensity	LLL
1238	V1238	var	variance	Wavelet	intensity	LLL
1239	V1239	median	median	Wavelet	intensity	LLL
1240	V1240	percentile10	percentile 10th	Wavelet	intensity	LLL
1241	V1241	percentile90	percentile 90th	Wavelet	intensity	LLL
1242	V1242	iqr	interquartile range	Wavelet	intensity	LLL
1243	V1243	Hrange	range	Wavelet	intensity	LLL
1244	V1244	mad	mean absolut deviation	Wavelet	intensity	LLL
1245	V1245	rmad	robust mean absolut deviation	Wavelet	intensity	LLL
1246	V1246	H_energy	energy	Wavelet	intensity	LLL
1247	V1247	H_entropy	entropy	Wavelet	intensity	LLL
1248	V1248	rms	root mean square	Wavelet	intensity	LLL
1249	V1249	H_uniformity	uniformity	Wavelet	intensity	LLL
1250	V1250	energy	energy	Wavelet	GLCM	LLL
1251	V1251	entropy	entropy	Wavelet	GLCM	LLL
1252	V1252	contrast	contrast	Wavelet	GLCM	LLL
1253	V1253	correlation	correlation	Wavelet	GLCM	LLL
1254	V1254	homogenity	homogeneity	Wavelet	GLCM	LLL
1255	V1255	homogenity_n	homogeneity normalized	Wavelet	GLCM	LLL
1256	V1256	idiff	inverese difference	Wavelet	GLCM	LLL
1257	V1257	idiff_n	inverese difference normalized	Wavelet	GLCM	LLL
1258	V1258	variance	variance	Wavelet	GLCM	LLL
1259	V1259	sum_average	sum of average	Wavelet	GLCM	LLL
1260	V1260	sum_entropy	sum of entropy	Wavelet	GLCM	LLL
1261	V1261	sum_variance	sum of variance	Wavelet	GLCM	LLL
1262	V1262	diff_entropy	difference entropy	Wavelet	GLCM	LLL
1263	V1263	diff_variance	difference variance	Wavelet	GLCM	LLL
1264	V1264	IMC1	information measures of correlation 1	Wavelet	GLCM	LLL
1265	V1265	IMC2	information measures of correlation 2	Wavelet	GLCM	LLL
1266	V1266	MCC	maximal correlation coefficient	Wavelet	GLCM	LLL
1267	V1267	joint_max	joint maximum	Wavelet	GLCM	LLL
1268	V1268	joint_average	joint average	Wavelet	GLCM	LLL
1269	V1269	diff_average	difference average	Wavelet	GLCM	LLL
1270	V1270	dissimilarity	dissimilarity	Wavelet	GLCM	LLL
1271	V1271	inverse_variance	inverse variance	Wavelet	GLCM	LLL
1272	V1272	autocorrelation	autocorrelation	Wavelet	GLCM	LLL
1273	V1273	clust_tendency	cluster tendency	Wavelet	GLCM	LLL
1274	V1274	clust_shade	cluster shade	Wavelet	GLCM	LLL
1275	V1275	clust_prominence	cluster prominence	Wavelet	GLCM	LLL
1276	V1276	M_energy	energy	Wavelet	mGLCM	LLL
1277	V1277	M_entropy	entropy	Wavelet	mGLCM	LLL
1278	V1278	M_contrast	contrast	Wavelet	mGLCM	LLL
1279	V1279	M_correlation	correlation	Wavelet	mGLCM	LLL
1280	V1280	M_homogenity	homogeneity	Wavelet	mGLCM	LLL
1281	V1281	M_homogenity_n	homogeneity normalized	Wavelet	mGLCM	LLL
1282	V1282	M_idiff	inverese difference	Wavelet	mGLCM	LLL
1283	V1283	M_idiff_n	inverese difference normalized	Wavelet	mGLCM	LLL
1284	V1284	M_variance	variance	Wavelet	mGLCM	LLL
1285	V1285	M_sum_average	sum of average	Wavelet	mGLCM	LLL
1286	V1286	M_sum_entropy	sum of entropy	Wavelet	mGLCM	LLL
1287	V1287	M_sum_variance	sum of variance	Wavelet	mGLCM	LLL
1288	V1288	M_diff_entropy	difference entropy	Wavelet	mGLCM	LLL
1289	V1289	M_diff_variance	difference variance	Wavelet	mGLCM	LLL
1290	V1290	M_IMC1	information measures of correlation 1	Wavelet	mGLCM	LLL
1291	V1291	M_IMC2	information measures of correlation 2	Wavelet	mGLCM	LLL
1292	V1292	M_MCC	maximal correlation coefficient	Wavelet	mGLCM	LLL
1293	V1293	M_joint_max	joint maximum	Wavelet	mGLCM	LLL
1294	V1294	M_joint_average	joint average	Wavelet	mGLCM	LLL
1295	V1295	M_diff_average	difference average	Wavelet	mGLCM	LLL
1296	V1296	M_dissimilarity	dissimilarity	Wavelet	mGLCM	LLL
1297	V1297	M_inverse_variance	inverse variance	Wavelet	mGLCM	LLL
1298	V1298	M_autocorrelation	autocorrelation	Wavelet	mGLCM	LLL
1299	V1299	M_clust_tendency	cluster tendency	Wavelet	mGLCM	LLL
1300	V1300	M_clust_shade	cluster shade	Wavelet	mGLCM	LLL
1301	V1301	M_clust_prominence	cluster prominence	Wavelet	mGLCM	LLL
1302	V1302	coarseness	coarseness	Wavelet	NGTDM	LLL
1303	V1303	neighContrast	contrast	Wavelet	NGTDM	LLL
1304	V1304	busyness	busyness	Wavelet	NGTDM	LLL
1305	V1305	complexity	complexity	Wavelet	NGTDM	LLL
1306	V1306	strength	strength	Wavelet	NGTDM	LLL
1307	V1307	len_intensityVar	grey level non-uniformity	Wavelet	GLRLM	LLL
1308	V1308	len_intensityVar_n	grey level non-uniformity normalized	Wavelet	GLRLM	LLL
1309	V1309	len_sizeVar	zone size non-uniformity	Wavelet	GLRLM	LLL
1310	V1310	len_sizeVar_n	zone size non-uniformity normalized	Wavelet	GLRLM	LLL
1311	V1311	len_sse	short runs emphasis	Wavelet	GLRLM	LLL
1312	V1312	len_lse	long runs emphasis	Wavelet	GLRLM	LLL
1313	V1313	len_lgse	low grey level run emphasis	Wavelet	GLRLM	LLL
1314	V1314	len_hgse	high grey level run emphasis	Wavelet	GLRLM	LLL
1315	V1315	len_sslge	short run low grey level emphasis	Wavelet	GLRLM	LLL
1316	V1316	len_sshge	short run high grey level emphasis	Wavelet	GLRLM	LLL
1317	V1317	len_lslge	long run low grey level emphasis	Wavelet	GLRLM	LLL
1318	V1318	len_lshge	long run high grey level emphasis	Wavelet	GLRLM	LLL
1319	V1319	len_rpc	run percentage	Wavelet	GLRLM	LLL
1320	V1320	len_grey_lev_var	grey level variance	Wavelet	GLRLM	LLL
1321	V1321	len_zone_size_var	run length variance	Wavelet	GLRLM	LLL
1322	V1322	len_size_entropy	run entropy	Wavelet	GLRLM	LLL
1323	V1323	M_len_intensityVar	grey level non-uniformity	Wavelet	mGLRLM	LLL
1324	V1324	M_len_intensityVar_n	grey level non-uniformity normalized	Wavelet	mGLRLM	LLL
1325	V1325	M_len_sizeVar	zone size non-uniformity	Wavelet	mGLRLM	LLL
1326	V1326	M_len_sizeVar_n	zone size non-uniformity normalized	Wavelet	mGLRLM	LLL
1327	V1327	M_len_sse	short runs emphasis	Wavelet	mGLRLM	LLL
1328	V1328	M_len_lse	long runs emphasis	Wavelet	mGLRLM	LLL
1329	V1329	M_len_lgse	low grey level run emphasis	Wavelet	mGLRLM	LLL
1330	V1330	M_len_hgse	high grey level run emphasis	Wavelet	mGLRLM	LLL
1331	V1331	M_len_sslge	short run low grey level emphasis	Wavelet	mGLRLM	LLL
1332	V1332	M_len_sshge	short run high grey level emphasis	Wavelet	mGLRLM	LLL
1333	V1333	M_len_lslge	long run low grey level emphasis	Wavelet	mGLRLM	LLL
1334	V1334	M_len_lshge	long run high grey level emphasis	Wavelet	mGLRLM	LLL
1335	V1335	M_len_rpc	run percentage	Wavelet	mGLRLM	LLL
1336	V1336	M_len_grey_lev_var	grey level variance	Wavelet	mGLRLM	LLL
1337	V1337	M_len_zone_size_var	run length variance	Wavelet	mGLRLM	LLL
1338	V1338	M_len_size_entropy	run entropy	Wavelet	mGLRLM	LLL
1339	V1339	intensityVar	grey level non-uniformity	Wavelet	GLSZM	LLL
1340	V1340	intensityVar_n	grey level non-uniformity normalized	Wavelet	GLSZM	LLL
1341	V1341	sizeVar	zone size non-uniformity	Wavelet	GLSZM	LLL
1342	V1342	sizeVar_n	zone size non-uniformity normalized	Wavelet	GLSZM	LLL
1343	V1343	sse	small zone emphasis	Wavelet	GLSZM	LLL
1344	V1344	lse	large zone emphasis	Wavelet	GLSZM	LLL
1345	V1345	lgse	low grey level zone emphasis	Wavelet	GLSZM	LLL
1346	V1346	hgse	high grey level zone emphasis	Wavelet	GLSZM	LLL
1347	V1347	sslge	small zone low grey level emphasis	Wavelet	GLSZM	LLL
1348	V1348	sshge	small zone high grey level emphasis	Wavelet	GLSZM	LLL
1349	V1349	lslge	large zone low grey level emphasis	Wavelet	GLSZM	LLL
1350	V1350	lshge	large zone high grey level emphasis	Wavelet	GLSZM	LLL
1351	V1351	rpc	zone percentage	Wavelet	GLSZM	LLL
1352	V1352	grey_lev_var	grey level variance	Wavelet	GLSZM	LLL
1353	V1353	zone_size_var	zone size variance	Wavelet	GLSZM	LLL
1354	V1354	size_entropy	zone size entropy	Wavelet	GLSZM	LLL
1355	V1355	GLDZM_intensityVar	grey level non-uniformity	Wavelet	GLDZM	LLL
1356	V1356	GLDZM_intensityVar_n	grey level non-uniformity normalized	Wavelet	GLDZM	LLL
1357	V1357	GLDZM_sizeVar	zone size non-uniformity	Wavelet	GLDZM	LLL
1358	V1358	GLDZM_sizeVar_n	zone size non-uniformity normalized	Wavelet	GLDZM	LLL
1359	V1359	GLDZM_sse	small distance emphasis	Wavelet	GLDZM	LLL
1360	V1360	GLDZM_lse	large distance emphasis	Wavelet	GLDZM	LLL
1361	V1361	GLDZM_lgse	low grey level zone emphasis	Wavelet	GLDZM	LLL
1362	V1362	GLDZM_hgse	high grey level zone emphasis	Wavelet	GLDZM	LLL
1363	V1363	GLDZM_sslge	small distance low grey level emphasis	Wavelet	GLDZM	LLL
1364	V1364	GLDZM_sshge	small distance high grey level emphasis	Wavelet	GLDZM	LLL
1365	V1365	GLDZM_lslge	large distance low grey level emphasis	Wavelet	GLDZM	LLL
1366	V1366	GLDZM_lshge	large distance high grey level emphasis	Wavelet	GLDZM	LLL
1367	V1367	GLDZM_rpc	zone percentage	Wavelet	GLDZM	LLL
1368	V1368	GLDZM_grey_lev_var	grey level variance	Wavelet	GLDZM	LLL
1369	V1369	GLDZM_zone_size_var	zone distance variance	Wavelet	GLDZM	LLL
1370	V1370	GLDZM_size_entropy	zone distance entropy	Wavelet	GLDZM	LLL
1371	V1371	NGLDM_intensityVar	grey level non-uniformity	Wavelet	NGLDM	LLL
1372	V1372	NGLDM_intensityVar_n	grey level non-uniformity normalized	Wavelet	NGLDM	LLL
1373	V1373	NGLDM_sizeVar	dependence count non-uniformity	Wavelet	NGLDM	LLL
1374	V1374	NGLDM_sizeVar_n	dependence count non-uniformity normalized	Wavelet	NGLDM	LLL
1375	V1375	NGLDM_sse	low dependence emphasis	Wavelet	NGLDM	LLL
1376	V1376	NGLDM_lse	high dependence emphasis	Wavelet	NGLDM	LLL
1377	V1377	NGLDM_lgse	low grey level count emphasis	Wavelet	NGLDM	LLL
1378	V1378	NGLDM_hgse	high grey level count emphasis	Wavelet	NGLDM	LLL
1379	V1379	NGLDM_sslge	low dependence low grey level emphasis	Wavelet	NGLDM	LLL
1380	V1380	NGLDM_sshge	low dependence high grey level emphasis	Wavelet	NGLDM	LLL
1381	V1381	NGLDM_lslge	high dependence low grey level emphasis	Wavelet	NGLDM	LLL
1382	V1382	NGLDM_lshge	high dependence high grey level emphasis	Wavelet	NGLDM	LLL
1383	V1383	NGLDM_grey_lev_var	grey level variance	Wavelet	NGLDM	LLL
1384	V1384	NGLDM_zone_size_var	dependence count variance	Wavelet	NGLDM	LLL
1385	V1385	NGLDM_size_entropy	dependence count entropy	Wavelet	NGLDM	LLL
1386	V1386	NGLDM_energy	dependence count energy	Wavelet	NGLDM	LLL
1387
1388
1389
1390
1391
1392
1393
1394
1395
1396
1397
1398
1399
1400
1401
1402
1403
1404
